1 **Title: Exosome-LncPICALM-AU1 regulates endothelial–mesenchymal transition in**  
2 **hepatopulmonary syndrome**

3

4 **Running title: exosome communication in distant organs**

5

6 Congwen Yang<sup>1</sup>, Yihui Yang<sup>2</sup>, Yang Chen<sup>1</sup>, Jian Huang<sup>1</sup>, Yujie Li<sup>1</sup>, Hongyu Zhi<sup>1</sup>, Xi Tang<sup>1</sup>,  
7 Xiaobo Wang<sup>3</sup>, Karine Belguise<sup>3</sup>, Zhengyuan Xia<sup>4</sup>, Jiaoling Ning<sup>1</sup>, Jianteng Gu<sup>1</sup>, Bin Yi<sup>1\*</sup>, Kaizhi  
8 Lu<sup>1\*</sup>

9

10

11 <sup>1</sup>Department of Anesthesia, Southwest Hospital, The Third Military Medical University,  
12 Chongqing 400038, China;

13 <sup>2</sup>Department of Anesthesia, The Third Affiliated Hospital of Zunyi Medical University, Zunyi,  
14 Guizhou, 563000 China.

15 <sup>3</sup>Université P. Sabatier Toulouse III and CNRS, LBCMCP, 31062 Toulouse Cedex 9, France;

16 <sup>4</sup>Department of Anaesthesiology, Li Ka Shing Faculty of Medicine, The University of Hong Kong,  
17 Hong Kong SAR, China.

18

19

20

21

22 \*Correspondence to: Kaizhi Lu, Ph.D. and Bin Yi, Ph.D.

23 E-mail: lukaizhi@163.net (K L), yibin1974@163.com (B Y)

24

## 25 **List of Abbreviations**

26 HPS, Hepatopulmonary syndrome; CBDL, common bile duct ligation; long  
27 noncoding RNA; PICALM-AU1; miR144-3p; ZEB1

28

29

30

31 **Abstract:**

32 As important mediators of intercellular communication, exosome have can modulate  
33 various cellular functions by transferring a variety of intracellular components to  
34 target cells. However, little is known about the role of exosome-mediated  
35 communication between distant organs. Hepatopulmonary syndrome (HPS) is a  
36 severe lung injury caused by chronic liver disease. A new long noncoding RNA  
37 (lncRNA) PICALM-AU1 was found and upregulated in the liver of HPS. It was  
38 located in the cholangiocytes of liver and then, secreted as exosome into the serum.  
39 PICALM-AU1 carrying serum exosomes induced endothelial-mesenchymal transition  
40 (EndMT) of PMVECs and promoted lung injury in vivo and in vitro. Furthermore,  
41 overexpression of PICALM-AU1 significantly suppressed miR144-3p and  
42 subsequently induced ZEB1 expression. Taken together, our findings identified  
43 cholangiocyte-derived exosomal lncRNA PICALM-AU1 plays a critical role in the  
44 EndMT of HPS lung. And PICALM-AU1 represents a noninvasive biomarker and  
45 potential therapeutic target for HPS.

46

47 **Keywords:** lncRNA, PICALM-AU1, exosome, serum, endothelial–mesenchymal  
48 transition (EndMT), hepatopulmonary syndrome (HPS)

## 49 **Introduction**

50 Hepatopulmonary syndrome (HPS), characterized by hypoxemia and  
51 intrapulmonary shunting, occurs in 5–32% of patients with liver disease [1]. HPS  
52 significantly increases mortality and worsens functional status and quality of life in  
53 patients with cirrhosis [2]. Despite a growing knowledge of the mechanisms involved  
54 in the development of HPS, its pathogenesis has not been fully elucidated [3-6]. The  
55 core pathogenic feature of HPS includes microvascular changes in pulmonary  
56 circulation. Intrapulmonary vascular dilation significantly reduces the efficiency of  
57 gas exchange in early-stage HPS lesions. The late stage of HPS is characterized by  
58 increased angiogenesis of microvessels that leads to severe hypoxemia and dyspnea  
59 [7]. This is a result of the molecules secreted from the damaged liver.

60 Pulmonary angiogenesis plays a vital role in the development of HPS [8]. Soluble  
61 molecules synthesized in the pathological liver, such as the vascular endothelial  
62 growth factor, bone morphogenic proteins 2 and 9, placental growth factor, and  
63 cyclooxygenase-2, can be transported to the lung via blood, thereby promoting  
64 pulmonary microvascularization and aggravating respiratory distress in individuals  
65 with HPS [9-12]. Endothelial–mesenchymal transition (EndMT) is characterized by  
66 the loss of endothelial cell features and acquisition of specific mesenchymal cell  
67 markers that are key in regulating endothelial function and development and structural  
68 remodeling of myocardium, blood vessels, and valves [13]. During endothelial  
69 dysfunction, EndMT induces vascular remodeling. Numerous studies have implicated  
70 EndMT in vascular diseases, including cerebral cavernous malformations, pulmonary  
71 hypertension, vascular graft remodeling, and atherosclerosis [14-17]. A lot of work  
72 has been done in the early stage, and the intervention of HPS has some effect, but not  
73 ideal. Although a recent study has implicated the involvement of exosomes [18], the  
74 mechanism(s) underlying the regulation of HPS pathology by EndMT remains to be  
75 fully understood.

76 Researchers have neglected the role of exosomes in the biology of HPS.  
77 Exosomes are small extracellular membrane-enclosed vesicles formed by the inward  
78 budding of the endosomal membrane and released extracellularly via fusion with the

79 plasma membrane. Exosomal cargos, including noncoding RNAs, proteins and lipids,  
80 are implicated in various liver diseases [19, 20]. Exosome function can be divided  
81 into two categories. First is for intercellular communication, or short distance  
82 communication: exosomes accumulating in the ischemic myocardium are rapidly  
83 taken up by infiltrating monocytes to regulate local inflammatory responses [21].  
84 Cancer-derived exosomal miR25-3p promotes the formation of a pre-metastatic niche  
85 [22]. Cholangiocyte-derived exosomal lncRNA H19 promotes the activation of  
86 hepatic stellate cells and cholestatic liver fibrosis [23, 24]. The second category of  
87 exosomes involve cross-organ communication, or long-distance communication. We  
88 have previously shown that hepatocyte-derived exosomal miR194 promotes the  
89 angiogenesis of pulmonary microvascular endothelial cells (PMVECs) in pulmonary  
90 HPS [25]. Exosomes secreted into the serum is transported to the lungs via  
91 long-distance transportation, thereby promoting the formation of pulmonary  
92 microvessels and aggravation of symptoms associated with HPS. Long noncoding  
93 RNAs (lncRNAs) in exosomes also play an important regulatory role for  
94 physiological functions and pathological progression, especially in HPS. Thus, we  
95 wanted to determine whether exosomes secreted from the liver contain crucial  
96 lncRNAs for the regulation of HPS using long-distance communication between  
97 organs.

98 In this study, we have identified a novel lncRNA (MRAK138283, named  
99 PICALM-AU1) using microarrays during the screening of the lungs of HPS rats. We  
100 have demonstrated that PICALM-AU1 was overexpressed in cholangiocyte-derived  
101 exosomes in the liver of HPS rats. Moreover, PICALM-AU1 levels in serum  
102 exosomes positively correlated with the severity of lung injury in the rat model of  
103 HPS and specimens from patients with HPS. Notably, cholangiocyte-derived  
104 exosomal PICALM-AU1 promoted EndMT in PMVECs in the HPS model. Thus,  
105 exosome-derived PICALM-AU1 in the liver of HPS rats regulate lung injury via  
106 long-distance communication between distant organs. Finally, PICALM-AU1 is a  
107 promising candidate for use a non-invasive diagnostic biomarker and therapeutic  
108 target for HPS.

109

## 110 **Materials and methods**

### 111 *HPS patient specimens*

112 All human specimen-related experiments in this study were approved by *Clinical*  
113 *Trials* <https://clinicaltrials.gov/> (NO. NCT03435406). Patients were diagnosed with  
114 HPS based on three parameters: (1) presence of cirrhosis, (2) positive  
115 contrast-enhanced echocardiography, and (3) an alveolar-arterial oxygen gradient  
116 (P(A-a) O<sub>2</sub>) ≥15 mmHg (or ≥20 mmHg in patients >64 years). Intrapulmonary  
117 vascular dilations were assessed using contrast-enhanced echocardiography. Agitated  
118 saline causes the formation of >10 μm microbubbles that usually do not pass through  
119 the pulmonary capillary bed. Appearance of microbubbles, after injecting into the  
120 peripheral vein, first in the right heart, within 3–6 heart actions in the left heart  
121 demonstrates abnormal vasodilation of the intrapulmonary capillary bed. Early (<3  
122 heart beats) appearance of microbubbles in the left heart was considered as  
123 intracardiac shunting. These patients were excluded from this study since the presence  
124 or absence of intrapulmonary shunting could not be judged using contrast-enhanced  
125 echocardiography.

### 126 *Animal model and treatments*

127 *Rat model for common bile duct ligation (CBDL)*. Rat model of CBDL is a  
128 typical model of HPS that was generated using a well-established methodology [26,  
129 27]. All animal experiments were approved by the Animal Care Committee of Third  
130 Military Medical University, Chongqing, China (NO. AMUWEC2020457). Male  
131 Sprague-Dawley rats (200–220 g, 30 rats/group) were anesthetized using chloral  
132 hydrate (Sigma-Aldrich, USA). The control (sham) rats were subjected to isolation of  
133 the common bile duct without ligation. The lungs of the animals were dissected and  
134 analyzed 1, 3, and 5 wk after surgery. Blood samples were aseptically drawn from the  
135 abdominal aorta during laparotomy. A 0.2 ml sample of arterial blood was collected in  
136 a heparinized gas capillary tube to measure arterial gas levels. Serum was separated  
137 from the blood samples (centrifugation at 2,000×g, 4°C) and used to separate  
138 exosomes.

139 *Exosome treatment.* To analyze the function of HPS-exosomes in the rat lung, rats  
140 were randomly divided into four groups (ss-Exo, sham-serum exosome; Hs-Exo, HPS  
141 serum exosome; ct-Exo, MIBECs-derived Exo; PO-Exo, PICALM-AU1 OE  
142 MIBECs-derived exosome). Exosomes isolated from sham and HPS rat sera and  
143 wildtype and PICALM-AU1-overexpressing mouse intrahepatic biliary epithelial  
144 cells (MIBECs). We injected rats with 100 µg total protein/100 µL three times and  
145 once every other day via the caudal vein.

146 *Virus treatment.* To analyze the function of PICALM-AU1 in the rat lung, we  
147 constructed lentiviral particles containing the sequence for PICALM-AU1  
148 overexpression (OE) and knockdown (KD). The LV-NC, LV-PICALM-OE, and  
149 LV-PICALM-KD viruses were injected via the caudal vein (each with 100 µL of  
150  $2 \times 10^{10}$  Transduction Unites (TU)/ml). After two weeks, the rats were subjected to  
151 CBDL. To investigate the function of exosomal PICALM-AU1 in the rat lung,  
152 MIBECs were treated with LV-NC and LV-PICALM-OE (each with 10 µL of  $1 \times 10^9$   
153 TU/mL). After 72 h, we measured PICALM-AU1 expression followed by isolation of  
154 exosomes to infect the rats. To analyze the function of PICALM-AU1 in PMVECs,  
155 PMVECs were treated with LV-NC, LV-PICALM-OE, and LV-PICALM-KD (each  
156 with 10 µL of  $1 \times 10^9$  TU/mL). After 72 h, gene expression, including protein levels,  
157 were measured.

### 158 *Isolation and characterization of exosomes*

159 Medium culturing human patient serum, rat serum, and MIBECs were collected  
160 by centrifugation at 2,000×g for 15 min followed by 16,000×g for 20 min at 4°C.  
161 Supernatants were collected and ultracentrifuged at 110,000×g for 70 min.  
162 Subsequently, pellets were resuspended in sterile phosphate-buffered saline and  
163 purified by centrifugation at 110,000×g for 1 h. The exosomes were resuspended in  
164 phosphate-buffered saline, filtered through 0.22 µm filters (Millipore, USA), and  
165 stored at -80°C for further analysis.

166 Transmission electron microscopy (Hitachi HT7700, Japan) was used to  
167 characterize the morphology of isolated exosomes. qNano (Izon Science, New  
168 Zealand) was used for the size distribution of the isolated exosomes following the

169 manufacturer's instructions. We used western blotting with the anti-CD63 and  
170 anti-CD86 antibodies to analyze the protein markers of exosomes.

### 171 ***Microarray analysis***

172 Total RNA from the liver of rats in the CBDL operation and sham groups were  
173 extracted and reverse transcribed. Double-stranded cDNA was labeled using the  
174 Quick Amp Labeling Kit (Agilent Technologies Inc, USA) and hybridized to the  
175 Array star Rat 8×60K lncRNA Array, version 2.0. Following the washing steps, the  
176 arrays were scanned using the Agilent Scanner G2505B and array images were  
177 analyzed using the Agilent Feature Extraction software, version 10.7.3.1. Quantile  
178 normalization and subsequent data processing were performed using the GeneSpring  
179 GX software, version 11.5.1 (Agilent Technologies Inc, USA). Volcano plot filtering  
180 was used to identify significantly different lncRNAs, and the threshold to screen  
181 upregulated or downregulated lncRNAs was set at a fold change of  $>\pm 1.5$  and  $P < 0.05$ .

### 182 ***Tissue harvest and histology***

183 Liver and lung samples were fixed in 4% phosphate-buffered formaldehyde  
184 solution (Klinipath, Belgium), dehydrated, embedded in paraffin, and subjected to  
185 hematoxylin and eosin (H.E.) staining, Masson staining, immunohistochemistry,  
186 immunofluorescence, and fluorescence *in situ* hybridization (FISH). Table S2 lists all  
187 the antibodies used in this study.

188 *H.E. staining.* Rat lung tissues were subjected to H.E. staining as described  
189 previously [26].

190 *Masson staining.* The degree of liver fibrosis was scored using Masson-stained  
191 liver sections (5  $\mu\text{m}$  thickness), the METAVIR scoring system (4), and quantitatively  
192 analyzed using the Cell<sup>^</sup>D software (Olympus Imaging Solutions, Germany). Data  
193 have been expressed as the mean fibrotic area/field ( $\% \pm \text{SE}$ ) positively stained using  
194 Sirius Red. The final score was represented as the mean of the scores determined by  
195 two independent researchers who were blinded to the study samples.

196 *Immunohistochemistry.* Immunohistochemical staining on lung tissue allowed to  
197 quantify protein expression levels. Specific anti-VWF, anti-VE-cadherin and  
198 anti-Vimentin were used. Slices that underwent immunostaining with omission of

199 primary antibodies or with IgG were used as negative controls. Paraffin-embedded  
200 lung sections (5  $\mu$ m thickness) were deparaffinized, rehydrated by serial immersion in  
201 ethanol, and pretreated with citrate buffer. Non-specific binding sites were blocked via  
202 incubation in 3% H<sub>2</sub>O<sub>2</sub> (Merck, Germany) and BSA respectively. Epitope detection  
203 was performed using the ultraView Universal DAB Detection Kit (Dako, Denmark).  
204 Counterstaining was performed with hematoxylin.

205 The vascular density of specimens stained for VWF was measured  
206 semi-quantitatively using Cell Software (Olympus, Japan). Results are expressed as  
207 mean positively stained area ( $\% \pm$  SE) per field. The number of macrophages per high  
208 power field (objective 40 $\times$ ) was counted in 15 randomly selected fields for each  
209 mouse, and the mean value of the cell counts in these fields was calculated (mean  
210 number of macrophages per field  $\pm$  SE). All final histological scores are represented  
211 as the mean of the scores determined by two independent researchers, who were  
212 blinded to the study samples.

213 *Immunofluorescence.* For immunofluorescent double staining, paraffin-embedded  
214 lung sections (5  $\mu$ m thickness) or cell slides were deparaffinized, rehydrated by serial  
215 immersion in ethanol and pretreated with EDTA, followed by incubation in 50 mM  
216 NH<sub>4</sub>Cl, 0.1% Triton X-100 and 1% BSA. Anti-VE-cadherin, anti-Vimentin,  
217 anti-ZEB1 and anti-ZO1 were used as primary antibodies. Slices that underwent  
218 immunostaining with omission of primary antibodies or with IgG were used as  
219 negative controls. The binding sites of the primary antibodies were revealed with  
220 Alexa Fluor-594 goat anti-rabbit and Alexa Fluor-488 goat anti-mouse secondary  
221 antibodies (Invitrogen, USA). Nuclei were stained with 4',  
222 6-diamidino-2-phenylindole (DAPI) (Life Technologies, USA). Samples were  
223 visualized with a fluorescence microscope (Olympus, Japan).

224 *FISH (Fluorescence in situ hybridization) combined with fluorescent IHC staining*

225 FISH targeting PICALM-AU1 in rat liver tissue sections was performed using a  
226 commercially available RNA scope Multiplex Fluorescent Reagent Kit v2 (Advanced  
227 Cell Diagnostics, USA) by following the manufacturer's instruction. Fluorescent IHC  
228 staining target PICALM-AU1 was performed after FISH staining as described in the



229 above section (Histopathology, Masson's Trichrome staining, and  
230 immunohistochemistry). Zeiss LSM 700 confocal laser scanning microscopy were  
231 used to visualize FISH results (Carl Zeiss, Germany).

### 232 *cDNA synthesis and quantitative polymerase chain reaction (qPCR)*

233 LncRNA, miRNA, and mRNA expression was analyzed using total RNA from  
234 tissues and cells and the Applied Biosystems 7000 sequence detection system  
235 (Applied Biosystems, UK), SYBR Green, and comparative CT method. Values were  
236 reported relative to the endogenous control glyceraldehyde-3-phosphate  
237 dehydrogenase. All amplification reactions were performed three times independently.  
238 Supplementary Table S1 lists the primer sequences used.

### 239 *Western blotting*

240 Protein levels were determined using western blotting of rat lung and PMVEC  
241 samples as previously described [28] using specific antibodies (Table S2). Blots were  
242 visualized using ECL reagents (DAKO, Denmark), and digital images were acquired  
243 using the luminescent image analyzer LAS-4000 (General Electric, UK).  $\beta$ -actin was  
244 used for the normalization of quantitative densitometry values.

### 245 *Cell culture and in vitro experiments*

246 Rat PMVECs and mouse MIBECs were purchased from American Type Culture  
247 Collection (ATCC Cell Biology Collection, USA). Cells were maintained at 37°C in  
248 RPMI medium (Gibco, USA) supplemented with 10% fetal bovine serum (Invitrogen,  
249 USA). For cell transfection experiments, cells were seeded at 60–70% confluency.  
250 Vectors were mixed with Lipofectamine 3000 (Promega, USA), diluted in EGM2, and  
251 treated for 24 h as previously described [28]. After 24 h, cells were incubated with  
252 miR144-3p mimics/inhibitor or sham/HPS exosomes. Subsequently, luciferase  
253 activity was measured using the Dual-Luciferase Reporter Assay System (Promega,  
254 USA) and GloMax-Multi Detection System Photometer (Promega, USA).

### 255 *Statistical analysis*

256 Results were obtained from at least three independent experiments and expressed  
257 as mean  $\pm$  standard deviation. Data were analyzed using two-tailed Student's *t*-test,  
258 one-way analysis of variance with Tukey's post-hoc test or linear regression using

259 GraphPad Prism software version 8.0 (GraphPad Software Inc., USA).  $P \leq 0.05$  was  
260 considered statistically significant.

261

## 262 **Results**

### 263 *lncRNA PICALM-AU1 is overexpressed in the HPS liver*

264 We constructed the rat model of HPS using CBDL to identify a key lncRNA  
265 involved in the regulation of the progression of HPS (Fig. 1A). The CBDL rat had  
266 cirrhosis, low efficiency of pulmonary gas exchange, and excessive angiogenesis of  
267 pulmonary microvessels (Fig. S1A–F). We then performed RNA sequencing to  
268 compare the RNA levels in the livers of CBDL and sham rats. After filtering data for  
269 long noncoding RNA annotation and expression levels, we identified 88 and 10  
270 lncRNAs that were upregulated and downregulated after CBDL, respectively. We  
271 chose the top 4 lncRNAs as primary candidates (Fig. 1B, C). qPCR analysis showed  
272 that MRAK138283 was upregulated in the early pathological phase in the liver of  
273 CBDL rat (Fig. 1E). BC158594 and MRAK079490 were induced during the late  
274 pathological phase (Fig. S1G, H). MRAK144056 did not show a specific trend of  
275 expression during the pathological progression of HPS (Fig. S1I). We used the  
276 following criteria to choose the lncRNA(s) involved in regulating the progression of  
277 HPS: (1) expression in the liver, (2) high expression in the early pathological stage of  
278 HPS, and (3) pathophysiological role of secretion from the liver into the lung. Thus,  
279 we choose to study MRAK138283 owing to its novelty. MRAK138283 (NCBI:  
280 LOC102550036, Ensembl: ENSRNOG00000062120) is encoded by the antisense  
281 strand of chromosome 1 in the rat and is upstream of the Picalm gene with two exons  
282 spanning 368 bp in the coding sequence (Fig. 1D). Accordingly, we named this  
283 lncRNA “PICALM-AU1.”

284 Furthermore, we analyzed the expression of PICALM-AU1 in different phases of  
285 the liver and normal tissues of sham and CBDL operated rats. PICALM-AU1 was  
286 overexpressed in the liver and lung (Fig. 1F) and significantly high in the liver of rats  
287 during the first week of HPS (Fig. 1E).

### 288 *Overexpression of lncRNA PICALM-AU1 in the liver of HPS rats and its secretion*

289 *via serum exosomes*

290 To determine the pattern of expression, we first examined PICALM-AU1 levels  
291 in the liver of sham and HPS rats using FISH. As expected, PICALM-AU1 was  
292 overexpressed in the livers of HPS rats than that in sham rats. The signal from  
293 PICALM-AU1 was primarily observed in rat cholangiocytes. Immunofluorescence  
294 using CD63, an exosomal surface marker, indicated that CD63 was upregulated in  
295 cholangiocytes (Fig. 2A).

296 To confirm the overexpression of PICALM-AU1 in the cholangiocytes, we  
297 detected the expression of PICALM-AU1 in the three main types of liver cells  
298 (cholangiocytes, Kupffer cells, and hepatocytes). As shown in Fig. 2B, the mRNA  
299 levels of PICALM-AU1 were high in cholangiocytes of the CBDL rats and were  
300 associated with the progression of HPS. PICALM-AU1 primarily localized to the  
301 cytoplasm (with slight localization in the nucleus) of cholangiocytes in the livers of  
302 HPS rats as compared to its localization in the sham rats (Fig. 2C).

303 Based on these findings, we speculated that PICALM-AU1 may be secreted from  
304 cholangiocytes in exosomes and functions in the lung. We isolated exosomes from  
305 sham and HPS rats and measured the expression of PICALM-AU1 (Fig. 2D).  
306 Correlation analysis showed that the mRNA levels of hepatic PICALM-AU1  
307 positively correlated with the PICALM-AU1 content in exosomes ( $r=0.7946$ ;  $p=0.002$ )  
308 and partial pressure of carbon dioxide ( $PCO_2$ ;  $r=0.7185$ ;  $p=0.0085$ ). The mRNA levels  
309 of hepatic PICALM-AU1 negatively correlated with the partial pressure of oxygen  
310 ( $PO_2$ ;  $r=0.7403$ ;  $p=0.0059$ , Fig. 2E).

311 To confirm these data, we selected 56 patients with HPS from 135 patients with  
312 chronic cirrhosis (Fig. 2F and Table 1). Patients with HPS had vertical dyspnea,  
313 positive type-B ultrasound, higher arterial  $PCO_2$ , and lower arterial  $PO_2$  than those in  
314 patients without HPS. Serum levels of Exo-PICALM-AU1 were higher in patients  
315 with HPS as compared to those in patients without HPS. Serum exosomal levels of  
316 PICALM-AU1 negatively correlated with  $PO_2$ , but positively correlated with  $PCO_2$ .  
317 These results indicate that cholangiocytes are the primary source of serum exosomal  
318 PICALM-AU1 and PICALM-AU1 levels were associated with pathological

319 progression of HPS.

320 ***Exo-PICALM-AU1 promotes PMVECs EndMT in the lungs of rats***

321 The cellular mechanism involved in EndMT, involved in various cardiovascular  
322 pathologies, includes tissue fibrosis after injury. EndMT in PMVECs plays an  
323 important role in regulating angiogenesis and blood vessel remodeling [29].  
324 Immunohistochemistry and western blotting showed a decrease and induction of the  
325 expression of VE-cadherin (endothelial biomarker) and vimentin (mesenchymal cell  
326 biomarker), respectively, in the lungs of HPS rats (Fig. S2A, B). Correlation analysis  
327 showed that VE-cadherin levels negatively correlated with that of vimentin in the  
328 lungs of HPS rats ( $r=0.8259$ ;  $p<0.0001$ ; Fig. S2A). We also detected the expression of  
329 PICALM-AU1 in the lungs with HPS. This indicated the induction in the expression  
330 of PICALM-AU1 in the 3 w and 5 w marks in the lungs of HPS rats (Fig. S2C).

331 To identify whether Exo-PICALM-AU1 stimulated EndMT in PMVECs, we used  
332 HPS rat-derived exosomes to treat normal rats (Fig. 3A). Using sham-serum Exo  
333 treatment as the control, we observed the decrease in mRNA and protein levels of  
334 VE-cadherin in the HPS rat-derived exosome treatment group. These samples  
335 exhibited increased mRNA and protein levels of vimentin. This was also observed in  
336 lungs treated with exosomes derived from PICALM-AU1-overexpressing MIBECs  
337 (Fig. 3B, C). The mRNA levels of PICALM-AU1 also increased dramatically in the  
338 lungs treated with HPS exosomes and MIBEC-derived exosomes that overexpressed  
339 PICALM-AU1 (Fig. 3B). Correlation analysis showed that PICALM-AU1 levels  
340 negatively correlated with that of VE-cadherin, and positively correlated with that of  
341 vimentin in the lungs of HPS rats ( $r_{VE-cadherin}=0.9572$ ,  $p<0.0001$ ;  $r_{vimentin}=0.9813$ ,  
342  $p<0.0001$ ; Fig. 3C).

343 Next, we wanted to investigate whether EndMT in PMVECs was induced by  
344 PICALM-AU1. CBDL rats were transfected with lentiviral particles containing the  
345 constructs for PICALM-AU1 overexpression or knockdown (Fig. 3D).  
346 PICALM-AU1-overexpressing rats manifested with increased pathological changes,  
347 downregulated VE-cadherin, and upregulated vimentin than those in rats of the sham  
348 and HPS group. PICALM-AU1 knockdown partially reversed the changes in the

349 pathology of HPS and expression of VE-cadherin and vimentin (Fig. 3E, F).  
350 Correlation analysis showed that PICALM-AU1 levels negatively correlated with that  
351 of VE-cadherin, and positively correlated with that of vimentin in the lungs of HPS  
352 rats ( $r_{VE-cadherin}=0.9816$ ,  $p<0.0001$ ;  $r_{Vimentin}=0.9793$ ,  $p<0.0001$ ; Fig. 3F).

353 We used exosomes from HPS rat sera and PICALM-AU1-overexpressing  
354 MIBECs to treat PMVECs and determine the effect of Exo-PICALM-AU1 on EndMT  
355 in PMVECs. The exosomal content from the HPS rats and MIBECs stimulated the  
356 proliferation and migration of PMVECs (Fig. 4A–C). Depletion of PICALM-AU1  
357 suppressed the proliferation and migration of PMVECs (Fig. 4D–F). Thus,  
358 PICALM-AU1 induced EndMT in PMVECs and stimulated the pathological  
359 progression of HPS.

#### 360 *miR144-3p is a target of PICALM-AU1*

361 To investigate how PICALM-AU1 regulated EndMT in PMVECs, we analyzed  
362 the gene expression network in the lungs of HPS rats using a microarray (data  
363 unpublished). microRNA 144-3p was found to be a putative target of PICALM-AU1  
364 (Fig. S3A). PICALM-AU1 contains a binding site for miR144-3p (Fig.5C). We have  
365 previously shown that miR144-3p inhibits PMVEC proliferation in the lungs of HPS  
366 rats [26], indicating that PICALM-AU1 may regulate EndMT in PMVECs via  
367 miR144-3p.

368 Lungs of HPS rats showed the downregulation of miR144-3p (Fig. S3B).  
369 Correlation analysis showed that miR144-3p levels in the lungs of HPS rats  
370 negatively correlated with Exo-PICALM-AU1 in the serum exosomes of HPS rats  
371 ( $r=0.9088$ ,  $p<0.0001$ ; Fig. S4A). miR144-3p levels positively correlated with that of  
372 VE-cadherin and negatively correlated with that of vimentin ( $r_{VE-cadherin}=0.9523$ ,  
373  $p<0.0001$ ;  $r_{Vimentin}=0.9558$ ,  $p<0.0001$ ; Fig. S4D).

374 miR144-3p in the rat lung was downregulated by HPS exosome treatment and  
375 PICALM-AU1-overexpressing MIBEC-derived exosomes (Fig. S3C). Correlation  
376 analysis showed that miR144-3p levels in the HPS rat lung negatively correlated with  
377 that of PICALM-AU1 in HPS rats ( $r=0.9017$ ,  $p<0.0001$ ; Fig. S4B). miR144-3p levels  
378 in the HPS rat lung positively correlated with that of VE-cadherin, and negatively

379 correlated with that of vimentin ( $r_{VE-cadherin}=0.9305$ ,  $p<0.0001$ ;  $r_{Vimentin}=0.895$ ,  
380  $p<0.0001$ ; Fig. S4E).

381 qPCR showed decreased levels of miR144-3p upon the overexpression of  
382 PICALM-AU1 than that in the control HPS group. Depletion of PICALM-AU1  
383 partially restored miR144-3p levels (Fig. S3D). Correlation analysis showed that  
384 miR144-3p levels in the HPS rat lung negatively correlated with that of  
385 PICALM-AU1 ( $r=0.9658$ ,  $p<0.0001$ ; Fig. S4C). miR144-3p levels in the HPS rat lung  
386 positively correlated with that of VE-cadherin, and negatively correlated with that of  
387 vimentin ( $r_{VE-cadherin}=0.9809$ ,  $p<0.0001$ ;  $r_{Vimentin}=0.9512$ ,  $p<0.0001$ ; Fig. S4F). Thus,  
388 miR144-3p levels in the HPS rat lung negatively correlated with that of  
389 PICALM-AU1 and EndMT in PMVECs.

#### 390 ***PICALM-AU1 suppresses the expression of miR144-3p***

391 First, to identify whether miR144-3p can regulate EndMT in PMVECs, we  
392 treated PMVECs with miR144-3p mimics and inhibitor. The overexpression of  
393 miR144-3p stimulated EndMT by upregulating and downregulating vimentin and  
394 VE-cadherin, respectively. Downregulation of miR144-3p inhibited EndMT by  
395 suppressing the expression of vimentin (Fig. 5A). Correlation analysis showed that  
396 miR144-3p levels in PMVECs positively correlated with that of VE-cadherin, and  
397 negatively correlated with that of vimentin ( $r_{VE-cadherin}=0.9525$ ,  $p<0.0001$ ;  
398  $r_{Vimentin}=0.9305$ ,  $p<0.0001$ ; Fig. 6B).

399 We used a luciferase reporter system to analyze the regulatory effect of  
400 PICALM-AU1 on miR144-3p (Fig. 5C). The pGL3 vector containing the 3'  
401 untranslated region (UTR) of Tie2 (with miR144-3p binding sites [26]) downstream  
402 of the LUC gene was transfected into PMVECs. Subsequently, miR144-3p mimics  
403 and inhibitor were used to treat PMVECs to upregulate and downregulate miR144-3p,  
404 respectively. The nuclear fragment of PICALM-AU WT and PICALM-AU1 MUT  
405 were used to overexpress PICALM-AU1. Luc activity was reduced by 20% and  
406 enhanced to 150% in PICALM-AU1 MUT-transfected PMVECs containing the  
407 miR144-3p mimics and inhibitor, respectively. Transfection of the wildtype  
408 PICALM-AU1 nuclear fragment into PMVECs restored the Luc activity in cells with



409 the miR144-3p mimics. And the Luc activity reached the maximum in miR144-3p  
410 inhibitor treated PMVECs (Fig. 5D). Thus, PICALM-AU1 negatively regulated the  
411 expression of miR144-3p in PMVECs.

412 To confirm this, we used lentiviral constructs to overexpress and knockdown  
413 PICALM-AU1 in PMVECs. PICALM-AU1 overexpression enhanced Luc activity by  
414 1.6-fold in PMVECs. PICALM-AU1 knockdown reduced Luc activity to 25% (Fig.  
415 5E). These results suggested that PICALM-AU1 can regulate EndMT in PMVECs by  
416 inhibiting the expression of miR144-3p.

#### 417 *miR144-3p inhibits EndMT in PMVECs via the ZEB1 transcription factor*

418 To analyze the role of miR144-3p in regulating EndMT in PMVECs, we used  
419 miRWalk, miRtarBase, and TargetScanHuman  
420 (<http://mirwalk.umm.uni-heidelberg.de/>,  
421 <http://mirtarbase.mbc.nctu.edu.tw/php/index.php>, and  
422 [http://www.targetscan.org/vert\\_71/](http://www.targetscan.org/vert_71/)) to determine the targets of miR144-3p. ZEB1 was  
423 a putative target of miR144-3p (Table S3). ZEB1, Zinc Finger E-Box Binding  
424 Homeobox 1, acts as a transcriptional repressor for interleukin-2 (IL-2) [30]. It also  
425 binds to and suppresses the transcription of E-cadherin to induce epithelial-  
426 mesenchymal transition by recruiting SMARCA4/BRG1 [30-32]. Thus, we  
427 overexpressed and knocked down miR144-3p using specific mimics and inhibitor, and  
428 used qPCR to determine the expression of ZEB1, SNAIL, TWIST, and SLUG.  
429 miR144-3p mimics reduced the mRNA levels of ZEB1 in PMVECs, while the  
430 miR144-3p inhibitor upregulated ZEB1 (Fig. 5F). Next, we overexpressed or knocked  
431 down PICALM-AU1 in PMVECs. Overexpression of PICALM-AU1 upregulated  
432 ZEB1 in PMVECs, whereas the depletion of PICALM-AU1 downregulated ZEB1  
433 (Fig. 5G). We then used dual-luciferase assays to analyze miR144-3p-mediated  
434 regulation of ZEB1. ZEB1 3' UTR was transfected into PMVECs and the cells were  
435 treated with miR144-3p mimics or inhibitor. miR144-3p bound to the 3' UTR of  
436 ZEB1 and inhibited Luc activity. Mutating the binding site abrogated the potential of  
437 miR144-3p to inhibit Luc activity (Fig. 5H). We overexpressed PICALM-AU1 in  
438 PMVECs; this partially recovered Luc activity by inhibiting miR144-3p (Fig. 5I).

439 These results showed that miR144-3p may inhibit EndMT in PMVECs via ZEB1, and  
440 PICALM-AU1 may stimulate EndMT by inhibiting miR144-3p.

441 *PICALM-AU1 promotes EndMT in PMVECs via the miR144-3p/ZEB1 axis*

442 To confirm whether PICALM-AU1 regulates EndMT in PMVECs via the  
443 miR144-3p/ZEB1 axis, we treated PMVECs with sham and HPS rat serum exosomes.  
444 Immunofluorescence, qPCR, and western blotting showed the upregulation of ZEB1  
445 along with downregulation of VE-cadherin, N-cadherin, and ZO-1 after HPS Exo  
446 treatment (Fig. 6A–C). Similarly, lentivirus-mediated overexpression of  
447 PICALM-AU1 upregulated ZEB1 and downregulated VE-cadherin and ZO-1.  
448 Depletion of PICALM-AU1 downregulated ZEB1 and upregulated VE-cadherin and  
449 ZO-1 (Fig. 6D–F). Taken together, these findings suggest that PICALM-AU1  
450 secreted in exosomes from cholangiocytes function in the HPS lung in promoting  
451 EndMT in PMVECs via the miR144-3p/ZEB1 regulatory axis.

452

453 **Discussion**

454 Previous studies have focused on understanding the underlying mechanism of  
455 pulmonary microvascular remodeling and concomitant improvement of pathology  
456 associated with HPS [33-38]. However, microvascular remodeling induces a limited  
457 effect. Thus, we speculated that liver disease precedes the development of HPS. To  
458 that extent, liver secretions may provide important information about the pathology of  
459 HPS. We have previously studied the regulation of c-kit<sup>+</sup> cells in the lung by serum  
460 SDF1 that is involved in angiogenesis of the pulmonary microvasculature [4]. In this  
461 study, we identified a novel lncRNA, PICALM-AU1, that was primarily expressed in  
462 cholangiocytes and secreted in exosomes. Cholangiocyte-derived PICALM-AU1  
463 induced EndMT in PMVECs and enhanced angiogenesis in HPS.

464 PICALM-AU1 is a novel lncRNA. It has two exons with 368 bp in its coding  
465 sequence. Tissues exhibit low expression of PICALM-AU1 under normal  
466 physiological conditions. However, we detected the overexpression of PICALM-AU1  
467 in the liver and lungs of HPS rats. Using immunopurification of primary  
468 cholangiocytes, laser capture microdissection, and FISH-immunohistochemistry, we



469 also revealed that cholangiocytes were the primary source of hepatic PICALM-AU1  
470 under physiologic and cholestatic conditions.

471 Exosomal PICALM-AU1 has a critical role in pathological angiogenesis in the  
472 lungs of HPS rats. Exosomes are small extracellular vehicles released by various  
473 types of cells, which can carry multiple cargos, including protein, DNA, mRNA,  
474 lncRNA and lipids [39-41]. Recently, exosomes have drawn significant attention as  
475 essential mediators of intercellular communication under physiological and  
476 pathological conditions [42]. Exosomal cargo in the serum, saliva, and urine can be  
477 used as potential biomarkers for low-invasive diagnoses of cancers [43-46]. Advanced  
478 stages of liver disease are irreversible and life-threatening and diagnosis of chronic  
479 liver disease at an early stage is challenging owing to the lack of non-invasive  
480 approaches and long asymptomatic disease progression. Several exosomal miRNAs  
481 and lncRNAs have been identified as potential diagnostic biomarkers for various liver  
482 diseases, including viral hepatitis, drug-induced liver injury, alcoholic liver disease,  
483 non-alcoholic fatty liver disease, hepatocellular carcinoma, and cholangiocarcinoma.  
484 In this study, we found that serum levels of exosomal PICALM-AU1 were closely  
485 correlated with hepatic PICALM-AU1 expression and severity of HPS. Data from  
486 patients with HPS showed that serum exosomal PICALM-AU1 is a potential  
487 diagnostic biomarker for HPS (Fig. S5A, B). However, it is unknown if functional  
488 PICALM-AU1 only resides in the liver. It is important to note the regulatory role of  
489 local PICALM-AU1 on EndMT in PMVECs.

490 EndMT is a core contributor of the formation of pulmonary microvasculature and  
491 component of pathways associated with the development of HPS. EndMT is  
492 reversible [47, 48]. Thus, it is important to understand the mechanisms involved in  
493 regulating EndMT for vascular remodeling and identification of novel therapeutic  
494 strategies aimed at reversing vascular remodeling to relieve the symptoms of HPS.  
495 This study focuses on the characteristics and functions of EndMT in vascular  
496 remodeling in HPS.

497

498 **Conclusions**

499 In summary, we have demonstrated the roles of PICALM-AU1 in regulating  
500 EndMT during pathological blood vessel remodeling in HPS via exosome-mediated  
501 communication between distant organs. These findings highlight the clinical  
502 significance of Exo-PICALM-AU1 signaling as part of a novel therapeutic  
503 intervention in patients with severe liver injuries. The limitation of this work is we  
504 only detected PICALM expression differences in HPS patient serum exosomes, but  
505 there were no more data on PICALM expression location, differences expression in  
506 the HPS patients liver, and the function of exosomal PICALM-AU1 in the lung. And  
507 how to effectively intervene PICALM-AU1 to achieve the therapeutic effect of HPS  
508 patients. These unresolved issues are also the direction of the team's efforts in the later  
509 stage.

#### 510 **Conflict of interest**

511 The authors declare that they have no conflict of interest.

#### 512 **Acknowledgments**

513 This project was supported by the National Science Foundation of China  
514 (81800060, 81671961, 81870422), China Postdoctoral Science Foundation  
515 (2017M623370) and Natural Science Foundation of Chongqing, China (xm2017085,  
516 cstc2020jcyj-msxmX0361).

#### 517 **Author contributions**

518 C.W.Y and K.Z.L designed the project, C.W.Y and Y.H.Y performed experiments,  
519 Y.C performed bioinformatics analyses, J.H and Y.J.L provided assistance with data  
520 analysis and curation, H.Y.Z and X.T collected HPS patients, J.L.N and J.T.G made  
521 animal model. B.Y and K.Z.L provided funding and supervision, C.W.Y and K. B  
522 wrote the manuscript, X.B.W and Z.Y.X revised the manuscript with input from all  
523 authors.

#### 524 **References**

- 525 1. Rodriguez-Roisin R, Krowka MJ: **Hepatopulmonary syndrome--a liver-induced lung vascular**  
526 **disorder**. *The New England journal of medicine* 2008, **358**(22):2378-2387.
- 527 2. Fallon MB, Krowka MJ, Brown RS, Trotter JF, Zacks S, Roberts KE, Shah VH, Kaplowitz N,  
528 Forman L, Wille K *et al*: **Impact of hepatopulmonary syndrome on quality of life and survival**  
529 **in liver transplant candidates**. *Gastroenterology* 2008, **135**(4):1168-1175.

- 530 3. Shen CC, Chen B, Gu JT, Ning JL, Chen L, Zeng J, Yi B, Lu KZ: **The angiogenic related functions**  
531 **of bone marrow mesenchymal stem cells are promoted by CBDL rat serum via the Akt/Nrf2**  
532 **pathway.** *Experimental Cell Research* 2016, **344**(1):86-94.
- 533 4. Shen CC, Chen B, Gu JT, Ning JL, Zeng J, Yi B, Lu KZ: **AMD3100 treatment attenuates**  
534 **pulmonary angiogenesis by reducing the c-kit (+) cells and its pro-angiogenic activity in**  
535 **CBDL rat lungs.** *Biochimica et biophysica acta* 2017, **1864**(3):676-684.
- 536 5. Lejealle C, Paradis V, Bruno O, de Raucourt E, Francoz C, Soubrane O, Lebrech D, Bedossa P,  
537 Valla D, Mal H *et al*: **Evidence for an association between intrahepatic vascular changes and**  
538 **the development of hepatopulmonary syndrome.** *Chest* 2018.
- 539 6. Yang C, Lv K, Chen B, Yang Y, Ai X, Yu H, Yang Y, Yi B, Lu K: **miR144-3p inhibits PMVECs**  
540 **excessive proliferation in angiogenesis of hepatopulmonary syndrome via Tie2.**  
541 *Experimental Cell Research* 2018, **365**(1):S001448271830082X.
- 542 7. Thenappan T, Goel A, Marsboom G, Fang YH, Toth PT, Zhang HJ, Kajimoto H, Hong Z, Paul J,  
543 Wietholt C *et al*: **A central role for CD68(+) macrophages in hepatopulmonary syndrome.**  
544 **Reversal by macrophage depletion.** *American journal of respiratory and critical care*  
545 *medicine* 2011, **183**(8):1080-1091.
- 546 8. Zhang J, Luo B, Tang L, Wang Y, Stockard CR, Kadish I, Van Groen T, Grizzle WE, Ponnazhagan S,  
547 Fallon MB: **Pulmonary angiogenesis in a rat model of hepatopulmonary syndrome.**  
548 *Gastroenterology* 2009, **136**(3):1070-1080.
- 549 9. Liu C, Chen L, Zeng J, Cui J, Ning JN, Wang GS, Belguise K, Wang X, Qian GS, Lu KZ *et al*: **Bone**  
550 **morphogenic protein-2 regulates the myogenic differentiation of PMVECs in CBDL rat**  
551 **serum-induced pulmonary microvascular remodeling.** *Exp Cell Res* 2015, **336**(1):109-118.
- 552 10. Liu C, Gao J, Chen B, Chen L, Belguise K, Yu W, Lu K, Wang X, Yi B: **Cyclooxygenase-2 promotes**  
553 **pulmonary intravascular macrophage accumulation by exacerbating BMP signaling in rat**  
554 **experimental hepatopulmonary syndrome.** *Biochem Pharmacol* 2017, **138**:205-215.
- 555 11. Raevens S, Geerts A, Paridaens A, Lefere S, Verhelst X, Hoorens A, Van DJ, Maes T, Bracke KR,  
556 Casteleyn C: **Placental growth factor inhibition targets pulmonary angiogenesis and**  
557 **represents a novel therapy for hepatopulmonary syndrome in mice.** *Hepatology* 2017,  
558 **68**(2).
- 559 12. Fischer C, Jonckx B, Mazzone M, Zacchigna S, Loges S, Pattarini L, Chorianopoulos E,  
560 Liesenborghs L, Koch M, De Mol M *et al*: **Anti-PlGF inhibits growth of**  
561 **VEGF(R)-inhibitor-resistant tumors without affecting healthy vessels.** *Cell* 2007,  
562 **131**(3):463-475.
- 563 13. Li Y, Lui KO, Zhou B: **Reassessing endothelial-to-mesenchymal transition in cardiovascular**  
564 **diseases.** *Nat Rev Cardiol* 2018, **15**(8):445-456.
- 565 14. Wesseling M, Sakkars TR, Jager SCAD, Pasterkamp G, Goumans MJ: **The morphological and**  
566 **molecular mechanisms of epithelial/endothelial-to-mesenchymal transition and its**  
567 **involvement in atherosclerosis.** *Vascul Pharmacol* 2018, **106**:S1537189118300065.
- 568 15. Takada S, Hojo M, Tanigaki K, Miyamoto S: **Contribution of Endothelial-to-Mesenchymal**  
569 **Transition to the Pathogenesis of Human Cerebral and Orbital Cavernous Malformations.**  
570 *Neurosurgery* 2017, **81**(1).
- 571 16. Coll-Bonfill N, Musri MM, Ivo V, Barberá JA, Tura-Ceide O: **Transdifferentiation of endothelial**  
572 **cells to smooth muscle cells play an important role in vascular remodelling.** *Am J Stem Cells*  
573 2016, **4**(1):13-21.

- 574 17. Cooley BC, Jose N, Jason M, Dan Y, Cynthia SH, Alejandra N, Fang F, Guibin C, Hong S, Walts  
575 AD: **TGF- $\beta$  signaling mediates endothelial-to-mesenchymal transition (EndMT) during vein**  
576 **graft remodeling.** *Science translational medicine* 2014, **6**(227):227ra234.
- 577 18. Visan KS, Lobb RJ, Moller A: **The role of exosomes in the promotion of**  
578 **epithelial-to-mesenchymal transition and metastasis.** *Front Biosci (Landmark Ed)* 2020,  
579 **25**:1022-1057.
- 580 19. Devhare PB, Ray RB: **Extracellular vesicles: Novel mediator for cell to cell communications in**  
581 **liver pathogenesis.** *Mol Aspects Med* 2017.
- 582 20. Masyuk AI, Masyuk TV, Larusso NF: **Exosomes in the pathogenesis, diagnostics and**  
583 **therapeutics of liver diseases.** *J Hepatol* 2013, **59**(3):621-625.
- 584 21. Loyer X, Zlatanova I, Devue C, Yin M, Howangyin KY, Klaihmon P, Guerin CL, Kheloufi M, Vilar J,  
585 Zannis K *et al*: **Intra-Cardiac Release of Extracellular Vesicles Shapes Inflammation Following**  
586 **Myocardial Infarction.** *Circ Res* 2018, **123**(1):100-106.
- 587 22. Zeng Z, Li Y, Pan Y, Lan X, Song F, Sun J, Zhou K, Liu X, Ren X, Wang F *et al*: **Cancer-derived**  
588 **exosomal miR-25-3p promotes pre-metastatic niche formation by inducing vascular**  
589 **permeability and angiogenesis.** *Nature communications* 2018, **9**(1):5395.
- 590 23. Li X, Liu R, Huang Z, Gurley EC, Wang X, Wang J, He H, Yang H, Lai G, Zhang L *et al*:  
591 **Cholangiocyte-derived exosomal long noncoding RNA H19 promotes cholestatic liver injury**  
592 **in mouse and human.** *Hepatology* 2018.
- 593 24. Liu R, Li X, Zhu W, Wang Y, Zhao D, Wang X, Gurley EC, Liang G, Chen W, Lai G *et al*:  
594 **Cholangiocyte-Derived Exosomal Long Noncoding RNA H19 Promotes Hepatic Stellate Cell**  
595 **Activation and Cholestatic Liver Fibrosis.** *Hepatology* 2019, **70**(4):1317-1335.
- 596 25. Chen L, Han Y, Li Y, Chen B, Bai X, Belguise K, Wang X, Chen Y, Yi B, Lu K: **Hepatocyte-derived**  
597 **exosomal MiR-194 activates PMVECs and promotes angiogenesis in hepatopulmonary**  
598 **syndrome.** *Cell Death Dis* 2019, **10**(11):853.
- 599 26. Yang C, Lv K, Chen B, Yang Y, Ai X, Yu H, Yang Y, Yi B, Lu K: **miR144-3p inhibits PMVECs**  
600 **excessive proliferation in angiogenesis of hepatopulmonary syndrome via Tie2.** *Exp Cell Res*  
601 2018.
- 602 27. Yang Y, Chen B, Chen Y, Zu B, Yi B, Lu K: **A comparison of two common bile duct ligation**  
603 **methods to establish hepatopulmonary syndrome animal models.** *Laboratory animals* 2015,  
604 **49**(1):71-79.
- 605 28. Yang C, Lin Y, Liu H, Shen G, Luo J, Zhang H, Peng Z, Chen E, Xing R, Han C *et al*: **The Broad**  
606 **Complex isoform 2 (BrC-Z2) transcriptional factor plays a critical role in vitellogenin**  
607 **transcription in the silkworm Bombyx mori.** *Biochimica et biophysica acta* 2014,  
608 **1840**(9):2674-2684.
- 609 29. Welch-Reardon KM, Wu N, Hughes CC: **A role for partial endothelial-mesenchymal**  
610 **transitions in angiogenesis?** *Arterioscler Thromb Vasc Biol* 2015, **35**(2):303-308.
- 611 30. Williams TM, Moolten D, Burlein J, Romano J, Bhaerman R, Godillot A, Mellon M, Rauscher FJ,  
612 Kant JA: **Identification of a zinc finger protein that inhibits IL-2 gene expression.** *Science*  
613 1991, **254**(5039):1791-1794.
- 614 31. Cooley BC, Nevado J, Mellad J, Yang D, St. Hilaire C, Negro A, Fang F, Chen G, San H, Walts AD:  
615 **TGF- $\beta$  Signaling Mediates Endothelial-to-Mesenchymal Transition (EndMT) During Vein**  
616 **Graft Remodeling.** *Science translational medicine* 2014, **6**(227):227ra234.
- 617 32. Sánchez-Tilló E, Lázaro A, Torrent R, Cuatrecasas M, Vaquero EC, Castells A, Engel P, Postigo A:

- 618 **ZEB1 represses E-cadherin and induces an EMT by recruiting the SWI/SNF**  
619 **chromatin-remodeling protein BRG1.** *Oncogene* 2010, **29**(24):3490-3500.
- 620 33. Liu C, Chen L, Zeng J, Cui J, Ning JN, Wang GS, Belguise K, Wang X, Qian GS, Lu KZ: **Bone**  
621 **morphogenic protein-2 regulates the myogenic differentiation of PMVECs in CBDL rat**  
622 **serum-induced pulmonary microvascular remodeling.** *Experimental Cell Research* 2015,  
623 **336**(1):109-118.
- 624 34. Chang CC, Wang SS, Hsieh HG, Lee WS, Chuang CL, Lin HC, Lee FY, Lee SD, Huang HC:  
625 **Rosuvastatin improves hepatopulmonary syndrome through inhibition of inflammatory**  
626 **angiogenesis of lung.** *Clinical science* 2015, **129**(6):449-460.
- 627 35. Xu D, Gu JT, Yi B, Chen L, Wang GS, Qian GS, Lu KZ: **Requirement of miR - 9 - dependent**  
628 **regulation of Myocd in PASMCs phenotypic modulation and proliferation induced by**  
629 **hepatopulmonary syndrome rat serum.** *Journal of Cellular & Molecular Medicine* 2015,  
630 **19**(10):2453-2461.
- 631 36. Yi B: **Annexin A1 protein regulates the expression of PMVEC cytoskeletal proteins in CBDL**  
632 **rat serum-induced pulmonary microvascular remodeling.** *Journal of Translational Medicine*  
633 2013, **11**(1):98.
- 634 37. Jing Z, Yi B, Zhi W, Ning J, Wang X, Lu K: **Effect of annexin A2 on hepatopulmonary syndrome**  
635 **rat serum-induced proliferation of pulmonary arterial smooth muscle cells.** *Respiratory*  
636 *Physiology & Neurobiology* 2013, **185**(2):332.
- 637 38. Yi B, Cui J, Ning J, Gu J, Wang G, Bai L, Qian G, Lu K: **cGMP-dependent protein kinase I $\alpha$**   
638 **transfection inhibits hypoxia-induced migration, phenotype modulation and annexins A1**  
639 **expression in human pulmonary artery smooth muscle cells.** *Biochemical & Biophysical*  
640 *Research Communications* 2012, **418**(4):598-602.
- 641 39. Kojima M, Gimenes-Junior JA, Langness S, Morishita K, Lavoie-Gagne O, Eliceiri B, Costantini  
642 TW, Coimbra R: **Exosomes, not protein or lipids, in mesenteric lymph activate inflammation:**  
643 **Unlocking the mystery of post-shock multiple organ failure.** *J Trauma Acute Care Surg* 2017,  
644 **82**(1):42-50.
- 645 40. Javeed N, Mukhopadhyay D: **Exosomes and their role in the micro-/macro-environment: a**  
646 **comprehensive review.** *The Journal of Biomedical Research* 2017, **30**(5):386-394.
- 647 41. Shashi B, Jan P, Shiv M, Donna C, Ivan L, Jeanine W, Hawau A, Karen K, Gyongyi S: **Circulating**  
648 **microRNAs in exosomes indicate hepatocyte injury and inflammation in alcoholic,**  
649 **drug-induced, and inflammatory liver diseases.** *Hepatology* 2012, **56**(5):1946-1957.
- 650 42. Kilchert C, Wittmann S, Vasiljeva L: **The regulation and functions of the nuclear RNA**  
651 **exosome complex.** *Nat Rev Mol Cell Biol* 2016, **17**(4):227-239.
- 652 43. Tai YL, Chen KC, Hsieh JT, Shen TL: **Exosomes in cancer development and clinical applications.**  
653 *Cancer Science* 2018, **109**(8).
- 654 44. Li W, Li C, Zhou T, Liu X, Liu X, Li X, Chen D: **Role of exosomal proteins in cancer diagnosis.**  
655 *Molecular Cancer* 2017, **16**(1):145.
- 656 45. Stone L: **Prostate cancer: Exosome RNA expression predicts high-grade disease.** *Nature*  
657 *Reviews Urology* 2016, **13**(6).
- 658 46. Joyce DP, Kerin MJ, Dwyer RM: **Exosome - encapsulated microRNAs as circulating**  
659 **biomarkers for breast cancer.** *International Journal of Cancer* 2016, **139**(7):1443-1448.
- 660 47. Okada H, Kalluri R: **Recapitulation of kidney development paradigms by BMP-7 reverses**  
661 **chronic renal injury.** *Clinical & Experimental Nephrology* 2005, **9**(2):100-101.

662 48. Hirokazu O, Raghu K: **Cellular and molecular pathways that lead to progression and**  
 663 **regression of renal fibrogenesis.** *Current Molecular Medicine* 2005, 5(5):-.

664

665 **Figure captions**

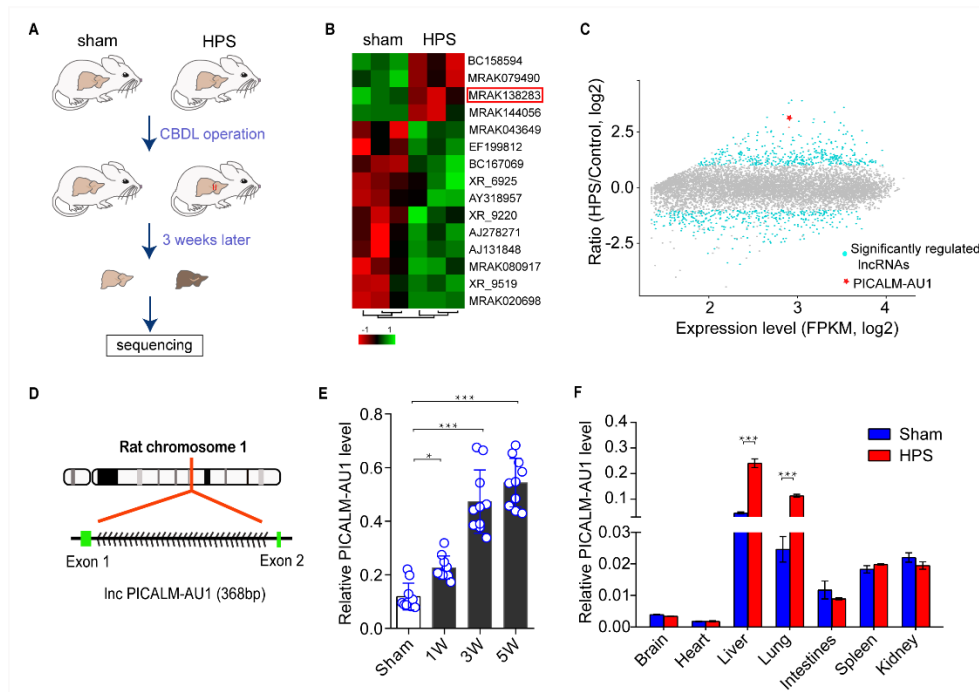

666

667 **Fig. 1 Overexpression of the long noncoding RNA (lncRNA) PICALM-AU1 in**  
 668 **the liver of rats with hepatopulmonary syndrome (HPS)**

669 A, Strategy involved in generating the rat model of common bile duct ligation (CBDL).

670 B, Analysis of differential gene expression using deep sequencing of the lncRNA array.

671 C, Differentially regulated lncRNAs have been highlighted in light blue (Red, PICALM-AU1).

672 D, The genomic location of PICALM-AU1 in the rat genome.

673 E–F, Quantitative polymerase chain reaction (qPCR) for the expression of PICALM-AU1 across  
 674 the different stages of HPS in the liver and tissues in the third week of HPS rats.

675 Statistical significance relative to sham group, Student's *t*-test: \* $P < 0.05$ , \*\* $P < 0.01$ , \*\*\* $P < 0.001$ ,

676  $n = 10$ .



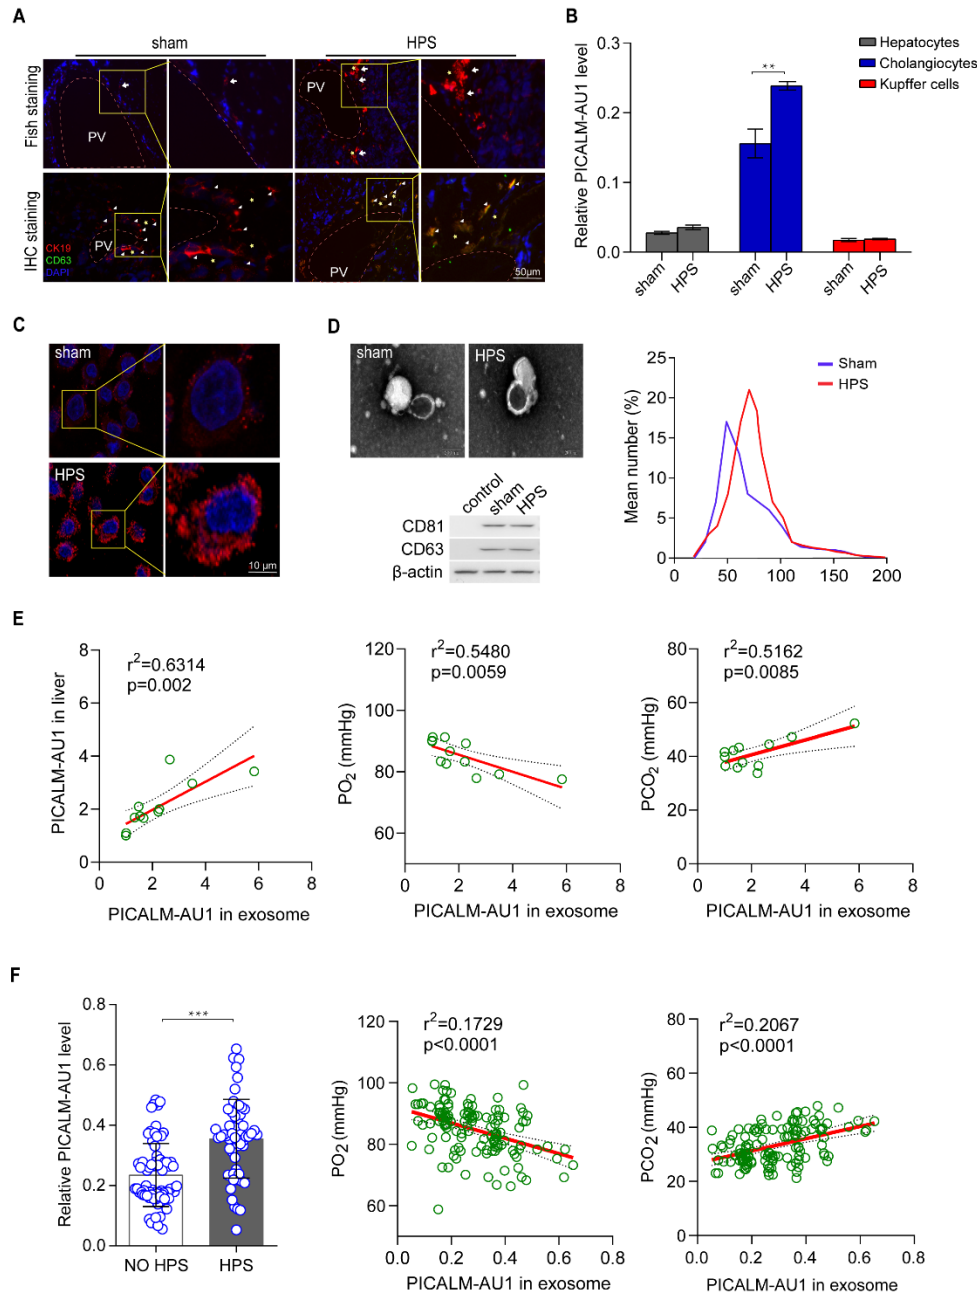

677

678 **Fig. 2 Expression and exosomal secretion of PICALM-AU1 in cholangiocytes**

679 A, Representative images of fluorescence *in situ* hybridization for PICALM-AU1 in the liver  
680 (upper panel). Representative images of immunofluorescence for CK19 and CD63 (lower panels).

681 Colocalization of CK19 and CD63 have been indicated using white triangles. Bile duct, yellow \*;

682 Portal vein, PV.

683 B, qPCR analysis for the expression of PICALM-AU1 in cholangiocytes, primary hepatocytes,

684 and Kupffer cells.

685 C, FISH for the subcellular localization of PICALM-AU1 in cholangiocytes cell.

686 D, Transmission electron micrographs (upper panel) and western blotting (lower panel) of  
687 exosomes isolated from the serum of sham and HPS rats (upper line). The number of exosomes  
688 were analyzed (right).

689 E, Correlation between hepatic PICALM-AU1 and serum exosomal PICALM-AU1 (left), partial  
690 pressure of oxygen ( $PO_2$ ) and exosomal PICALM-AU1 (middle), partial pressure of carbon  
691 dioxide ( $PCO_2$ ) and exosomal PICALM-AU1 (right).

692 F, Expression of exosomal PICALM-AU1 in 56 and 73 patients with HPS and chronic liver  
693 without HPS (left), respectively. We also analyzed the correlation between  $PO_2$  and exosomal  
694 PICALM-AU1 (middle) and  $PCO_2$  and exosomal PICALM-AU1 (right).



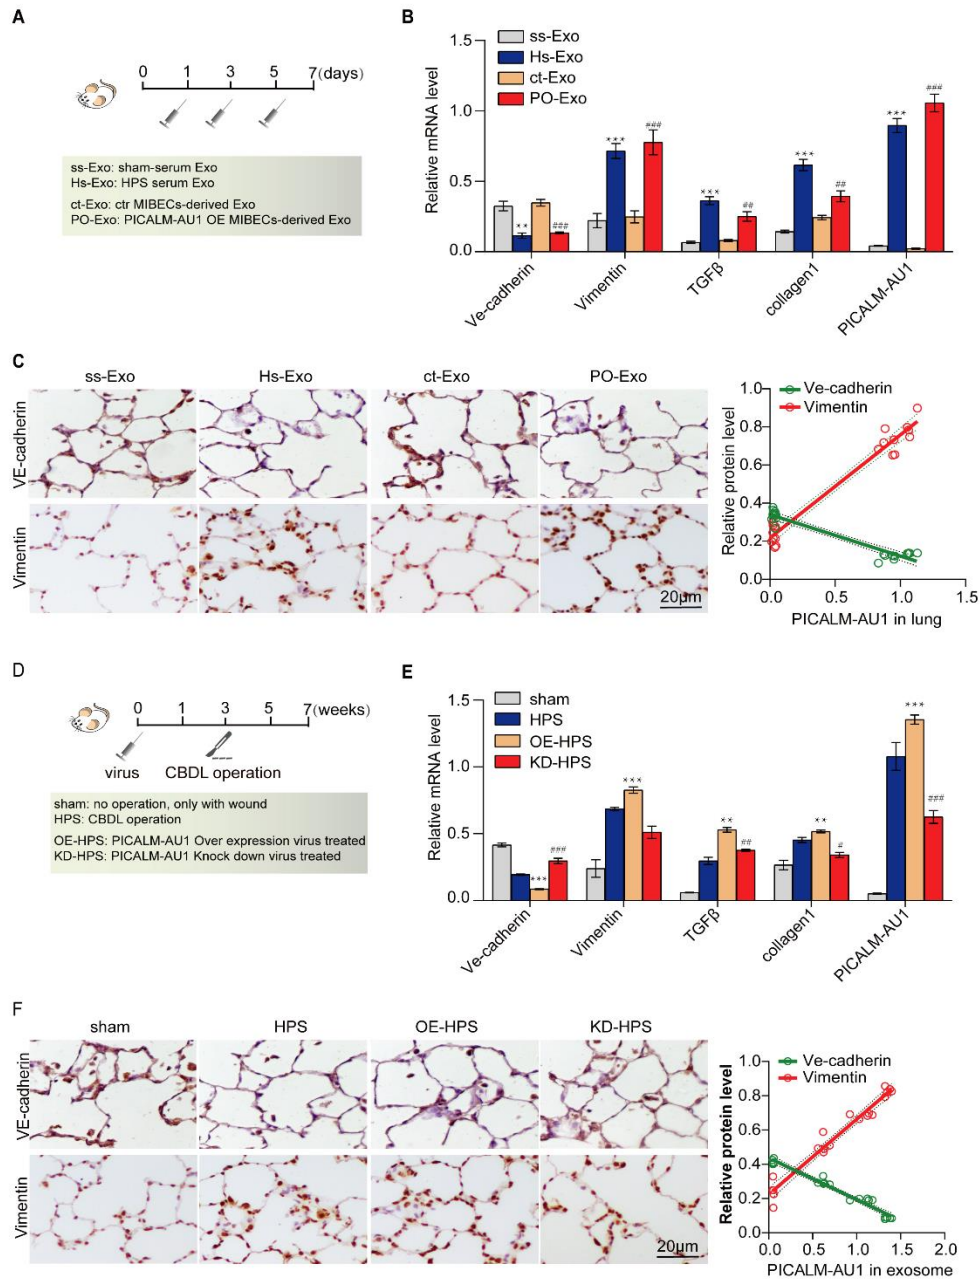

695

696 **Fig. 3 Exo-PICALM-AU1 promoted endothelial-mesenchymal transition**  
697 **(EndMT) in pulmonary microvascular endothelial cells (PMVECs)**

698 A, Experimental protocol used for treating rats with exosomes.

699 B, qPCR analysis for relative mRNA levels. Statistical significance relative to ss-Exo treated  
700 group, \*P<0.05, \*\*P<0.01, \*\*\*P<0.001; relative to ct-Exo treated group, #P<0.05, ###P<0.01,  
701 ###P<0.001, n=5.

702 C, Immunohistochemistry showing the downregulation of VE-cadherin (endothelial cell marker)  
703 and upregulation of vimentin (mesenchymal cell marker) in rats with progressing HPS; (ss-Exo,

704 Serum exosomes from sham rat; HPS-Exo, serum exosomes from 3-wk-old CBDL rats; ct-Exo,  
 705 exosomes from the culture medium of control mouse intrahepatic biliary epithelial cells [MIBECs];  
 706 PO-Exo, exosomes from PICALM-AU1-overexpressing MIBECs). (Left, Immunohistochemistry;  
 707 Right, Linear regression analysis of VE-cadherin and vimentin).  
 708 D, Experimental set-up for the overexpression and knockdown of PICALM-AU1 in HPS rats.  
 709 E, qPCR analysis for relative mRNA levels. Statistical significance relative to the sham group,  
 710 \*P<0.05, \*\*P<0.01, \*\*\*P<0.001; relative to the HPS group, #P<0.05, ##P<0.01, ###P<0.001, n=5.  
 711 Data were compared using two-way analysis of variance.  
 712 F, Immunohistochemistry for the downregulation of VE-cadherin and overexpression of vimentin  
 713 during HPS in the lungs of rats. (Left, Immunohistochemistry; Right, Linear regression analysis of  
 714 VE-cadherin and vimentin).  
 715

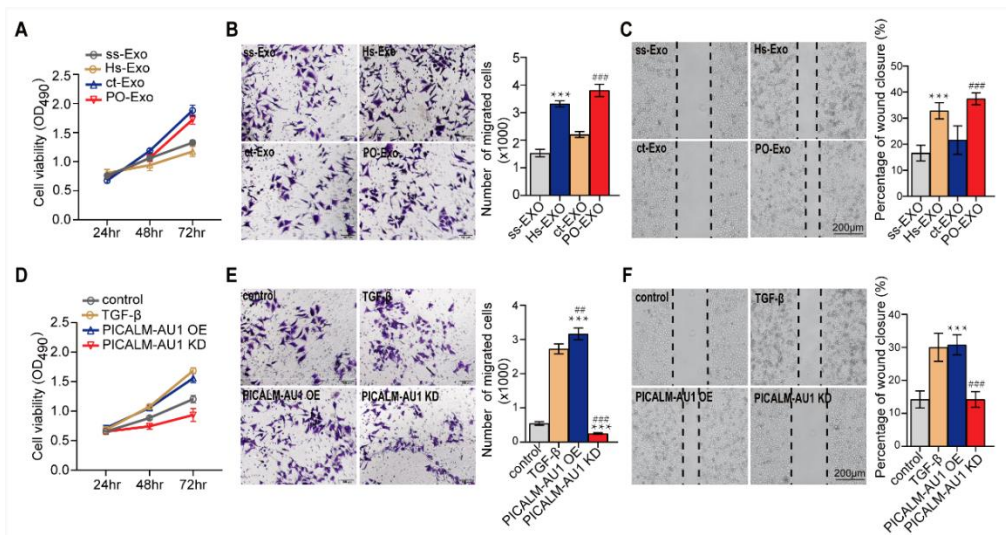

716  
 717 **Fig. 4 Exo-PICALM-AU1 promoted PMVEC proliferation and migration**

718 A–C, Exosome-treated PMVECs. HPS rat serum-derived exosomes and PICALM-AU1-over  
 719 expression MIBECs cells derived exosome induced PMVEC proliferation (A) and migration (B,  
 720 C). Statistical significance relative to the ss-Exo treated group, \*P<0.05, \*\*P<0.01, \*\*\*P<0.001;  
 721 relative to the ct-Exo treated group, #P<0.05, ##P<0.01, ###P<0.001, n=5.  
 722 D–F, Lentivirus-mediated over expression and knockdown of PICALM-AU1 in PMVECs. D,  
 723 Overexpression of PICALM-AU1 induced PMVEC proliferation (D) and migration (E, F).  
 724 Depletion of PICALM-AU1 reduced PMVEC proliferation and migration; statistical significance  
 725 relative to control, \*P<0.05, \*\*P<0.01, \*\*\*P<0.001; relative to TGF-β, #P<0.05, ##P<0.01,

726 ###P<0.001, n=5. Data were analyzed using two-way analysis of variance.

727

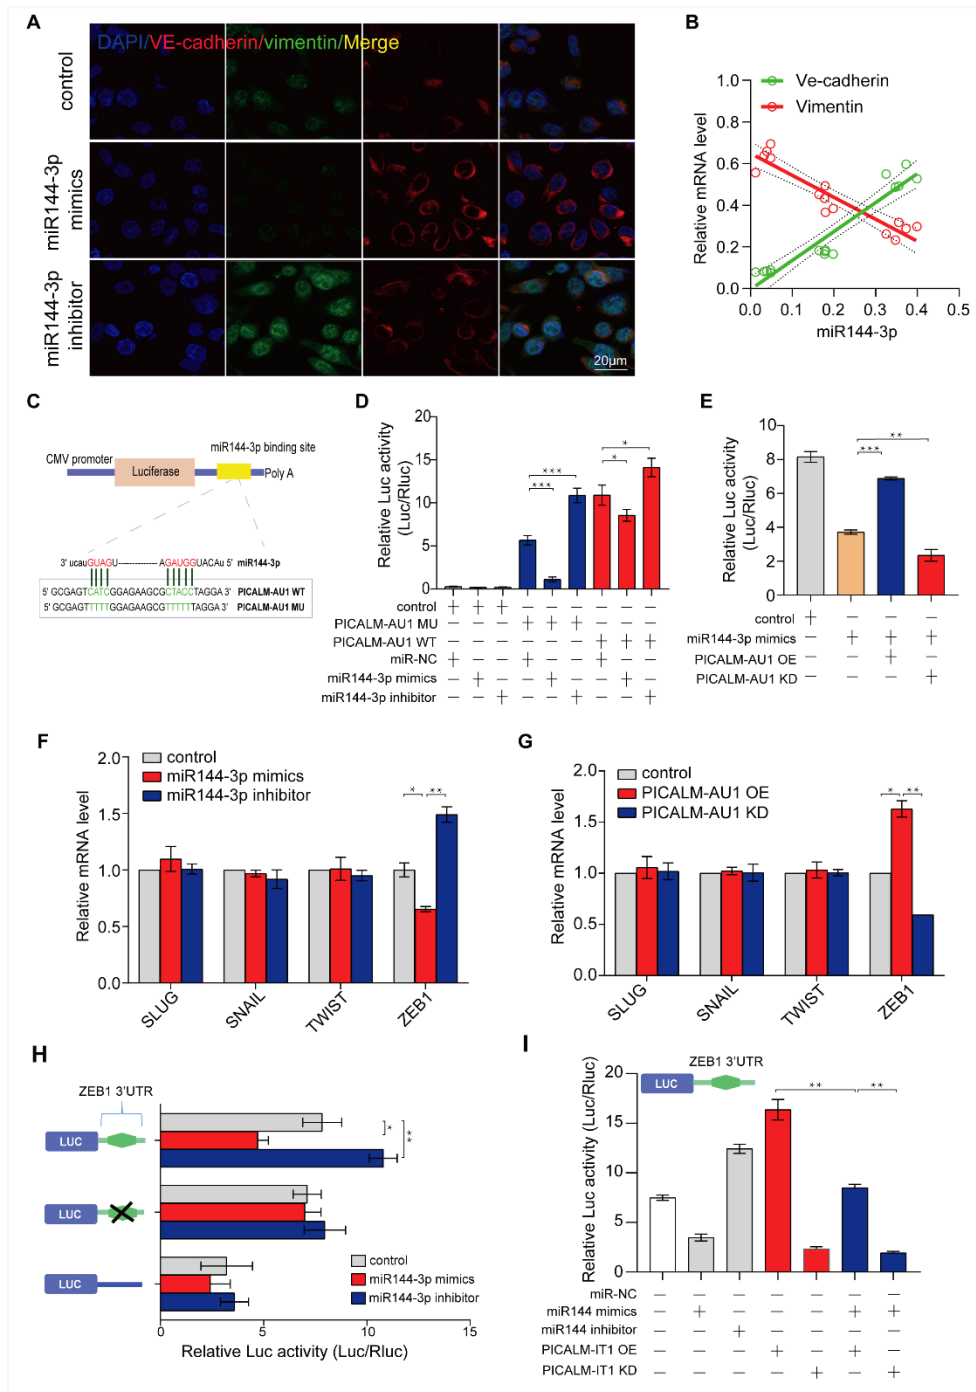

728

729 **Fig. 5 PICALM-AU1 promoted EndMT in PMVECs by inhibiting**  
 730 **miR144-3p/Zeb1**

731 A, Immunofluorescence for the expression of VE-cadherin and vimentin in PMVECs treated with  
 732 miR144-3p mimics and inhibitor.

733 B, Linear regression analysis of miR144-3p levels and VE-cadherin/vimentin levels in PMVECs

734 treated with miR144-3p-specific mimics and inhibitor.

735 C, Schematic for the predicted binding sites of miR144-3p on lncRNA PICALM-AU1.

736 D, Luciferase activity of psiCHECK2-PICALM-AU1 and psiCHECK2-PICALM-AU1mut in  
737 PMVECs transfected with the indicated miRNA mimics (n=3). psiCHECK2-miR144-3p (3×) was  
738 used as the positive control. Data have represented as the ratio of Renilla luciferase activity to  
739 Firefly luciferase activity.

740 E, Luciferase activity of psiCHECK2-PICALM-AU1 in PICALM-AU1-overexpressing or  
741 -depleted PMVECs.

742 F, qPCR analysis for the expression of key EndMT-associated transcription factor in PMVECs  
743 overexpressing/depleted of miR144-3p.

744 G, qPCR analysis for the expression of key EndMT-associated transcription factor in PMVECs  
745 overexpressing/depleted of PICALM-AU1.

746 H, Dual-luciferase assay for the inhibition of ZEB1 by miR144-3p.

747 I, Dual-luciferase assay for the regulated expression of miR144-3p/ZEB1 by PICALM-AU1.

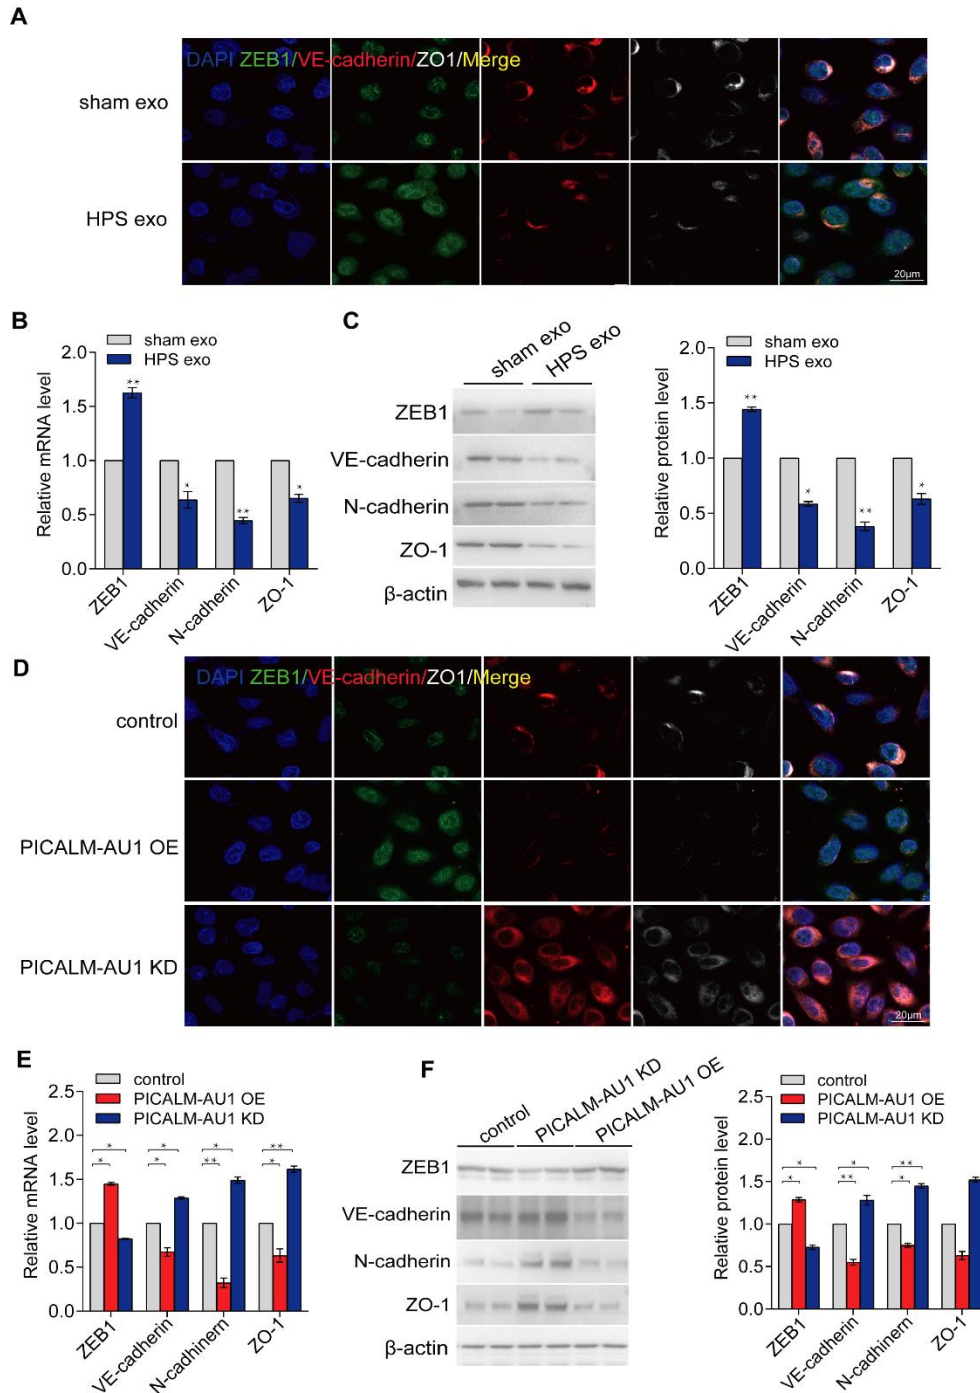

748

749 **Fig. 6 PICALM-AU1 induced EndMT in PMVECs by inhibiting**  
 750 **miR144-3p/ZEB1**

751 A–C, Immunofluorescence, qPCR, and western blotting showing the overexpression of ZEB1 and  
 752 downregulation of VE-cadherin and ZO-1 after treatment with HPS exosomes as compared to  
 753 those after treatment with sham exosomes.

754 D–F, Immunofluorescence, qPCR, and western blotting showed the overexpression of ZEB1 and  
 755 downregulation of VE-cadherin and ZO-1 in PICALM-AU1-overexpressing samples. Depletion of

756 PICALM-AU1 reduced ZEB1 expression and induced the expression of VE-cadherin and ZO-1.

757

**Table 1. Basic feature of HPS patients**

|                                                                          | NO HPS<br>(N=73)   | HPS (N=56)           | $\chi^2$ | P value |
|--------------------------------------------------------------------------|--------------------|----------------------|----------|---------|
| Age at diagnosis, median (min, max), y                                   | 44 (18, 75)        | 51.5 (21, 75)        |          |         |
| Sex, male (female) [ratio]                                               | 55 (18)<br>[75.3%] | 44 (12.0)<br>[78.6%] |          |         |
| median (min, max), cm                                                    | 168 (148, 177)     | 165 (150,<br>180)    |          |         |
| median (min, max), kg                                                    | 61 (39, 90)        | 64.5 (42, 96)        |          |         |
| pathology, (hepatitis B/others)                                          | 45/28              | 43/13                | 3.351    | 0.086   |
| Aspartate transaminase, AST, U/L                                         | 94.09±89.1         | 114.31±84.74         |          | 0.913   |
| Cerealthirdtransaminase, ALT, U/L                                        | 144.35±190.59      | 88.91±78.2           |          | 0.001   |
| Albumin, mg/dl                                                           | 35.06±4.91         | 30.74±4.8            |          | 0.867   |
| Globulin, GLB, mg/dl                                                     | 30.43±7.3          | 31.53±7.84           |          | 0.237   |
| prothrombin time, PT                                                     | 13.98±3.5          | 18.77±5.07           |          | 0.003   |
| Meld index                                                               | 61.94±6.38         | 67.56±7.11           |          | 0.22    |
| Vertical dyspnea, (Yes/No)                                               | 18/55              | 40/16                | 28.014   | <0.0001 |
| partial pressure of oxygen in artery                                     | 98.56±2.65         | 86.92±19.11          |          | 0.027   |
| partial pressure of carbon dioxide in artery                             | 38.86±2.67         | 35.97±4.12           |          | 0.001   |
| alveolar-arterial oxygen tension difference, P(A-a)O <sub>2</sub> , mmHg | 8.62±6.91          | 28.56±8.52           |          | 0.023   |
| Type-B ultrasonic, (positive/negative)                                   | 16/57              | 56/0                 | 70.891   | <0.0001 |
| Clubbing digits                                                          | 27/46              | 23/33                | 5.13     | 0.024   |
| Spider angioma                                                           | 7.03±4.68          | 5.2±3.82             | 25.745   | 0.041   |

758

759

760

761

762

763

764

765

766

767

768 **Supplementary Figures**



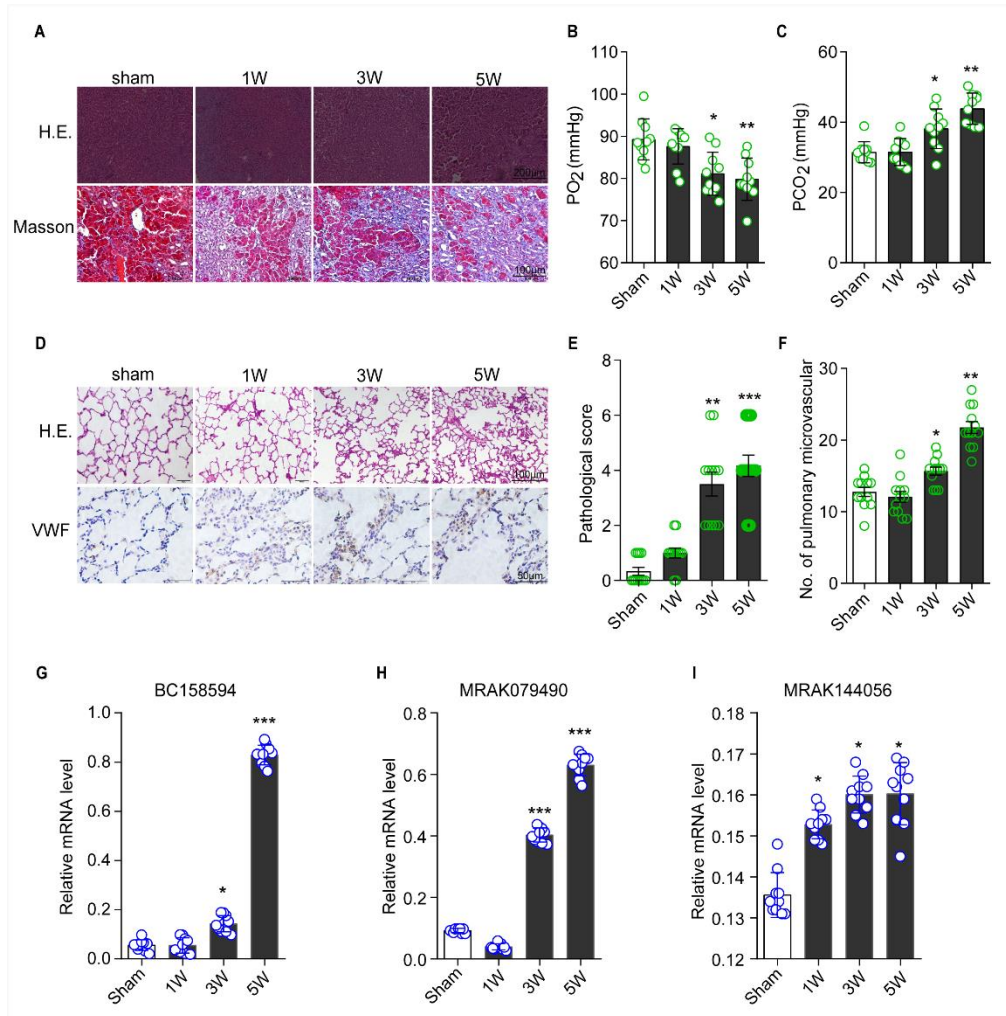

769

770 **Fig. S1 Generation of the rat model of CBDL**

771 A, H.E. staining and Masson staining of the liver of HPS rats.

772 B-C, PO<sub>2</sub> and PCO<sub>2</sub> in HPS rats.

773 D, H.E. staining and lung vascular staining.

774 E-F, Pathological score and the number of pulmonary microvasculature in HPS rat lung.

775 G-I, qPCR for BC158594, MRAK079490 and MRAK144056 levels in the HPS liver.

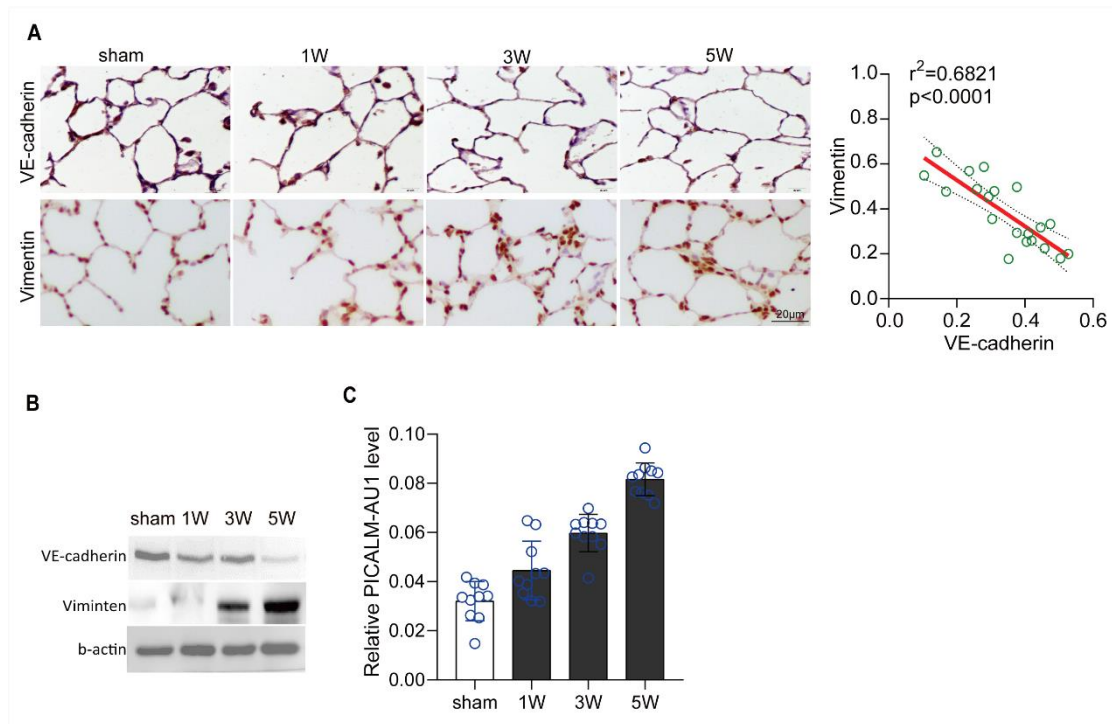

776

777 **Fig. S2 EndMT in PMVECs of the lungs of HPS rats**

778 A, (Left) Immunofluorescence for the expression of VE-cadherin and vimentin in the lungs of  
779 CBDL rats. (Right) Linear regression analysis of vimentin and VE-cadherin expression.

780 B, Western blotting for the protein levels of VE-cadherin and vimentin in the lungs of CBDL rats.

781  $\beta$ -actin was the internal control.



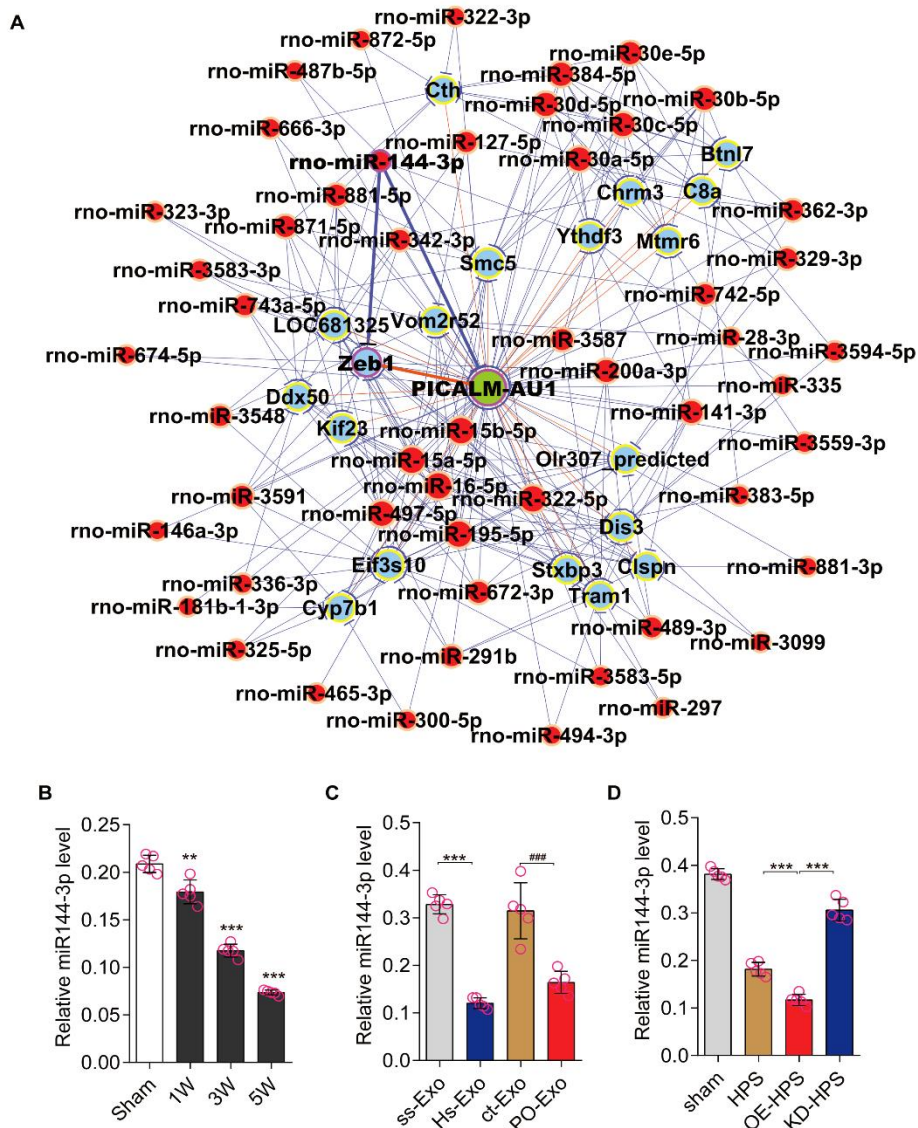

782

783 **Fig. S3 Regulatory network of PICALM-AU1**

784 A, Regulatory network of PICALM-AU1. Genes colored in blue represent mRNAs and lncRNAs;

785 those in red represent miRNAs.

786 B, qPCR analysis miR144-3p levels in the lungs of HPS rats. Statistical significance relative to the

787 sham group, \*P<0.05, \*\*P<0.01, \*\*\*P<0.001.

788 C, qPCR analysis for miR144-3p levels in exosome-treated rats. Statistical significance relative to

789 the ss-Exo treated group, \*P<0.05, \*\*P<0.01, \*\*\*P<0.001; relative to ct- Exo treated group,

790 #P<0.05, ##P<0.01, ###P<0.001.

791 D, qPCR analysis for miR144-3p levels in lentivirus-mediated PICALM-AU1-overexpressing or

792 -depleted lungs of HPS rats. Statistical significance relative to the sham group, \*P<0.05, \*\*P<0.01,

793 \*\*\*P<0.001; relative to the HPS group, #P<0.05, ##P<0.01, ###P<0.001.

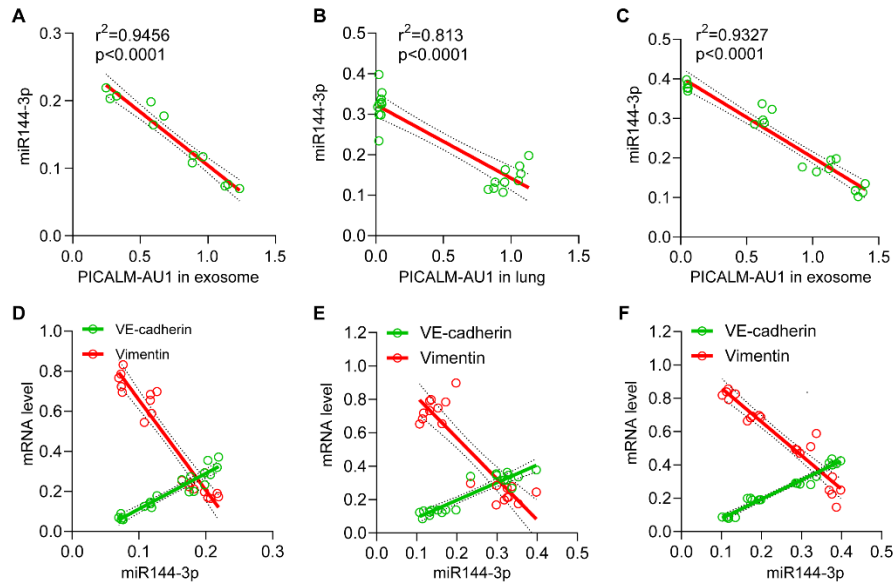

794

795 **Fig. S4 Correlation between the expression of miR144-3p and PICALM-AU1 and**  
 796 **EndMT marker genes in HPS rats and PMVECs**

797 A–C, Linear regression analysis for miR144-3p levels and PICALM-AU1 levels in the lungs. (A,  
 798 in 3-wk-old CBDL rat model; B, in exosome-treated rat model; C, in  
 799 PICALM-AU1-overexpressing or -depleted rat model)

800 D–F, Linear regression analysis for the expression of miR144-3p and EndMT markers  
 801 (VE-cadherin and vimentin) in the lungs. (A, in 3-wk-old CBDL rat model; B, in exosome-treated  
 802 rat model; C, in PICALM-AU1-overexpressing or -depleted rat model)

803

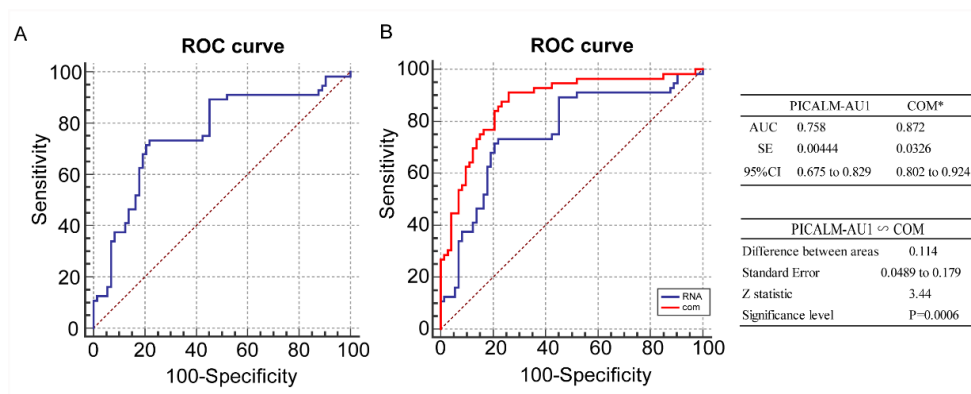

804

805 **Figure.S5 PICALM-AU1 level in HPS patient serum can be as a biomarker for**  
 806 **HPS detection.**

807 A, ROC curve of PICALM-AU1; B, ROC curve of PICALM-AU1 and combine with spider  
 808 angioma, total bile acid and vertical dyspnea.

**Table S1. Primers for this study**

| Gene name                  | Assay      | Primer direction | Primer sequence                      |
|----------------------------|------------|------------------|--------------------------------------|
| <i>PICALM-AU1</i>          | cloning,   | Forward          | 5'-AGGGACAGGCAGCTGCAGGAA-3'          |
|                            | sequencing | Reverse          | 5'-GACGAAGCTTCTGATCCCAA-3'           |
| <i>PICALM-AU1</i>          | q-RT PCR   | Forward          | 5'-TGACGCTCCCTGCCAACAGGT-3'          |
|                            |            | Reverse          | 5'-GATAGCAGTTGGAGAGATTTCAG-3'        |
| <i>miR144-3p</i>           | q-RT PCR   | Forward          | 5'-TACAGTATAGATGATGTACT-3'           |
| <i>miR144-5p</i>           | q-RT PCR   | Forward          | 5'-GGATATCA TCATATACTG TAAGT-3'      |
| <i>pG13-LUC-PICALM-AU1</i> | cloning    | Forward          | 5'-CGTGACGCTCCCTGCCAACA-3'           |
| <i>WT</i>                  |            | Reverse          | 5'-AGATAGCAGTTGGAGAGATTTC-3'         |
| <i>pG13-LUC-PICALM-AU1</i> | cloning    | Forward          | 5'-GCGAGTTTTTGGAGAAGCGTTTTTATAGGA-3' |
| <i>MUT</i>                 |            | Reverse          | 5'-TCCTAAAAACGCTTCTCCAAAACTCGC-3'    |
| <i>VE-cadherin</i>         | q-RT PCR   | Forward          | 5'-CAITGAGACAGACCCCGACC-3'           |
|                            |            | Reverse          | 5'-CTGTCACTGGTCTTGGGAT-3'            |
| <i>Vimentin</i>            | q-RT PCR   | Forward          | 5'-TGAGATCGCCACCTACAGGA-3'           |
|                            |            | Reverse          | 5'-AAGGTCATCGTGGTGTGAG-3'            |
| <i>SLUG</i>                | q-RT PCR   | Forward          | 5'-CCTCACCTCAGGAGCGTACA-3'           |
|                            |            | Reverse          | 5'-CTGAAAGCTTGGGCTGGAGT-3'           |
| <i>Snail</i>               | q-RT PCR   | Forward          | 5'-GAAAGGCCTTCTCCAGGCC-3'            |
|                            |            | Reverse          | 5'-GTATCTCTCACATCCGAGTGGG-3'         |
| <i>TWIST</i>               | q-RT PCR   | Forward          | 5'-AGTCGCTGAACGAGGCATT-3'            |
|                            |            | Reverse          | 5'-GCAGCTTGCCATCTTGGAGT-3'           |
| <i>ZO-1</i>                | q-RT PCR   | Forward          | 5'-CCGCGGCATTTTAAACAGCA-3'           |
|                            |            | Reverse          | 5'-TCACAGTGTGGCAAGCGTAG-3'           |
| <i>GAPDH</i>               | q-RT PCR   | Forward          | 5'-CCAAGGTCATCCATGACAACCTT-3'        |
|                            |            | Reverse          | 5'-AGGGGCCATCCACAGTCTT-3'            |

809

**Table. S2 Antibodies information**

| Protein name   | Assay                 | Manufacturer              | NO.      | Additional information                  |
|----------------|-----------------------|---------------------------|----------|-----------------------------------------|
| VE-cadherin    | Western blot, IHC, IF | abcam                     | ab33168  | Western blot, 1:2000; IHC and IF, 1:200 |
| Vimentin       | Western blot, IHC     | Cell Signaling Technology | 5741     | Western blot, 1:5000; IHC and IF, 1:200 |
| VWF            | Western blot, IHC     | abcam                     | ab6994   | Western blot, 1:5000; IHC and IF, 1:200 |
| CK19           | Western blot, IF      | abcam                     | ab7754   | IHC and IF, 1:250                       |
| CD63           | Western blot, IF      | abcam                     | ab217345 | Western blot, 1:5000; IF, 1:200         |
| CD81           | Western blot          | abcam                     | ab243887 | Western blot, 1:2000                    |
| ZO-1           | Western blot, IF      | abcam                     | ab96587  | Western blot, 1:2000; IF, 1:200         |
| ZEB1           | Western blot, IF      | abcam                     | ab203829 | Western blot, 1:2000; IF, 1:100         |
| TWIST          | Western blot          | abcam                     | ab50581  | Western blot, 1:2000                    |
| Snail          | Western blot          | abcam                     | ab229701 | Western blot, 1:2000                    |
| SLUG           | Western blot          | Cell Signaling Technology | 9585     | Western blot, 1:2000                    |
| N-cadherin     | Western blot          | Cell Signaling Technology | 14215    | Western blot, 1:2000                    |
| $\beta$ -actin | Western blot          | Cell Signaling Technology | 3700s    | Western blot, 1:10000                   |

810

**Table.S3 Prediction of miR144-3p target**

| ID                         | miRNA          | Target  | Validation methods |              |      |                      |     | SUM | # of papers |
|----------------------------|----------------|---------|--------------------|--------------|------|----------------------|-----|-----|-------------|
|                            |                |         | Strong evidence    |              |      | Less strong evidence |     |     |             |
|                            |                |         | Reporter assay     | Western blot | qPCR | micro array          | NGS |     |             |
| <a href="#">MIRT053494</a> | hsa-miR-144-3p | ZFX     | ✓                  | ✓            | ✓    | ✓                    | ✓   | 5   | 3           |
| <a href="#">MIRT438343</a> | hsa-miR-144-3p | MET     | ✓                  | ✓            | ✓    | ✓                    | ✓   | 5   | 2           |
| <a href="#">MIRT437437</a> | hsa-miR-144-3p | EZH2    | ✓                  | ✓            | ✓    |                      | ✓   | 4   | 1           |
| <a href="#">MIRT005869</a> | hsa-miR-144-3p | NOTCH1  | ✓                  | ✓            | ✓    |                      | ✓   | 4   | 2           |
| <a href="#">MIRT543081</a> | hsa-miR-144-3p | APP     | ✓                  | ✓            | ✓    |                      | ✓   | 3   | 2           |
| <a href="#">MIRT731796</a> | hsa-miR-144-3p | ZEB1    | ✓                  | ✓            | ✓    |                      |     | 3   | 1           |
| <a href="#">MIRT731798</a> | hsa-miR-144-3p | ZEB2    | ✓                  | ✓            | ✓    |                      |     | 3   | 1           |
| <a href="#">MIRT735303</a> | hsa-miR-144-5p | CCNE1   | ✓                  |              | ✓    | ✓                    |     | 3   | 1           |
| <a href="#">MIRT735304</a> | hsa-miR-144-5p | CCNE2   | ✓                  |              | ✓    | ✓                    |     | 3   | 1           |
| <a href="#">MIRT006872</a> | hsa-miR-144-3p | MTOR    | ✓                  | ✓            | ✓    |                      |     | 3   | 3           |
| <a href="#">MIRT007190</a> | hsa-miR-144-3p | PTEN    | ✓                  | ✓            | ✓    |                      |     | 3   | 1           |
| <a href="#">MIRT007310</a> | hsa-miR-144-3p | NFE2L2  | ✓                  | ✓            | ✓    |                      |     | 3   | 2           |
| <a href="#">MIRT054851</a> | hsa-miR-144-3p | TTN     | ✓                  | ✓            | ✓    |                      |     | 3   | 1           |
| <a href="#">MIRT731688</a> | hsa-miR-144-3p | MAP3K8  | ✓                  | ✓            | ✓    |                      |     | 3   | 1           |
| <a href="#">MIRT732183</a> | hsa-miR-144-3p | PTGS2   | ✓                  | ✓            | ✓    |                      |     | 3   | 1           |
| <a href="#">MIRT732445</a> | hsa-miR-144-3p | Adamts1 | ✓                  | ✓            | ✓    |                      |     | 3   | 1           |
| <a href="#">MIRT733172</a> | hsa-miR-144-3p | TUG1    | ✓                  | ✓            | ✓    |                      |     | 2   | 1           |
| <a href="#">MIRT733522</a> | hsa-miR-144-3p | XIST    | ✓                  | ✓            | ✓    |                      |     | 3   | 1           |
| <a href="#">MIRT733751</a> | hsa-miR-144-3p | PBX3    | ✓                  | ✓            | ✓    |                      |     | 3   | 1           |
| <a href="#">MIRT734389</a> | hsa-miR-144-5p | RUNX1   | ✓                  | ✓            | ✓    |                      |     | 3   | 1           |
| <a href="#">MIRT734437</a> | hsa-miR-144-5p | TGIF1   | ✓                  | ✓            | ✓    |                      |     | 3   | 1           |
| <a href="#">MIRT734527</a> | hsa-miR-144-3p | IRS1    | ✓                  | ✓            | ✓    |                      |     | 3   | 1           |
| <a href="#">MIRT735210</a> | hsa-miR-144-5p | ROCK1   | ✓                  | ✓            | ✓    |                      |     | 3   | 2           |

811
